# Supplementary material
Source: publisher figshare collection journal article supplement (https://diabetesjournals.figshare.com/articles/dataset/_/14542332)
Supplement: Supplementary file 1 [file 1]

**Estonian Biobank Research Team:**

Andres Metspalu<sup>1</sup>, Tõnu Esko<sup>1</sup>, Lili Milani<sup>1</sup>

- 1) Estonian Genome Centre, Institute of Genomics, University of Tartu, Tartu, Estonia
