# Supplementary material
Source: publisher figshare collection journal article supplement (https://diabetesjournals.figshare.com/articles/dataset/_/14542332)
Supplement: Supplementary file 1 [file 1]

## Sheet: Supplementary Table 1
Supplementary Table 1: characteristics of the Estonian Biobank study population
Results presented at the mean with standard devision or as indicated otherwise
			Stratification of case population by age of diagnosis
	Controls	All cases	Cases < 50 years	Cases 50 – 60 years	Cases 60 – 70 years	Cases > 70 years
N	9812	7052	1776	2147	1918	1211
Age at study visit, in years	70.43 (7.26)	58.83 (12.72)	44.61 (10.08)	56.85(7.24)	64.5 (6.60)	74.18 (6.39)
Age at diagnosis, in years	78.15 (6.11)*	57.8(12.6)	41.2(7.6)	55.2(2.8)	64.6(2.9)	76.2(4.8)
% of women	0.66	0.64	0.62	0.62	0.65	0.71

## Sheet: Supplementary Table 2
Supplementary Table 2: characteristics of the BioMe Biobank (European-ancestry only) study population
Data presented as mean (standard deviation), or as stated otherwise. * (for cases) or at most recent contact with MSHS (for controls). MSHS denotes Mount Sinai Health System.
			Stratification of case population by age of diagnosis
	Controls	All cases	Cases < 50 years	Cases 50 – 60 years	Cases 60 – 70 years	Cases > 70 years
N	2247	973	148	244	351	230
Age at enrolment, in years	72.2 (7.2)	63.9 (12.0)	44.0 (7.5)	56.5 (4.8)	66.0 (4.4)	77.0 (5.7)
Age at diagnosis, in years	78.4 (5.2)*	61.9 (11.9)	42.3 (6.5)	55.3 (2.8)	64.9 (2.8)	76.7 (5.2)
% of women	0.52	0.36	0.38	0.38	0.32	0.39

## Sheet: Supplementary Table 3
Supplementary Table 3: associations of SNPs identified in all cases of diabetes mellitus in the different age groups
Results presented as the per-SNP change in risk in logodds together with the standard error (SE) and P-value (P). All p-values presented in the grey column are <5e-8.
									Overall GWAS			Look-up in DIAGRAM (PMID: 30297969)				Diagnosed before age 50 years			Diagnosed between age 50 and 60 years			Diagnosed between age 60 and 70 years			Diagnosed after age 70 years
Locus	rsID	Chromosome	Position	Mapped gene 1	Mapped gene 2	Effect allele	Effect allele frequenct	Imputation quality	Beta	SE	P	Effect allele	Beta	SE	P	Beta	SE	P	Beta	SE	P	Beta	SE	P	Beta	SE	P	Average difference between consecutive age groups	P for interaction
1	rs537182386	1	39611191	MACF1		C	0.766429	0.996691	-0.0698974	0.0108726	1.3e-10					-0.0473015	0.0319621	0.14	-0.0827483	0.0188542	1.1e-05	-0.0686965	0.0164239	2.9e-05	-0.0702313	0.0249823	0.0049	-0.00764328	0.456576
2	rs3768321	1	40035928	RP11-69E11.8		G	0.803468	0.996681	-0.0680121	0.0115783	4.3e-09	T	0.085	0.008	1.3e-26	-0.0372716	0.0340312	0.27	-0.0989015	0.0200647	8.3e-07	-0.059151	0.0174937	0.00072	-0.0629647	0.0265938	0.018	-0.00856437	0.0992504
3	rs12063954	1	120618076	NOTCH2	RP11-114O18.1	C	0.91527	0.782998	-0.119731	0.0187498	1.7e-10					-0.111364	0.0552715	0.044	-0.123898	0.0326008	0.00014	-0.130605	0.0283602	4.1e-06	-0.114806	0.0432023	0.0079	-0.0011475	0.0116689
3	rs4659284	1	120638503	RP11-114O18.1	RNU6-465P	T	0.865816	0.755417	-0.0902961	0.015707	9e-09					-0.0511677	0.0462452	0.27	-0.106292	0.0272762	9.7e-05	-0.10133	0.0237355	2e-05	-0.0663878	0.036143	0.066	-0.00507338	0.0744071
4	rs340882	1	214145731	PROX1-AS1		C	0.377843	0.985703	-0.0639007	0.00951955	1.9e-11	C	-0.067	0.0065	1.1e-24	-0.029572	0.0278876	0.29	-0.051842	0.0164705	0.0016	-0.0542044	0.0143443	0.00016	-0.110722	0.0218025	3.8e-07	-0.02705	0.108064
4	rs79687284	1	214150821	PROX1-AS1		G	0.964784	0.996771	-0.166148	0.0249879	2.9e-11	C	0.18	0.018	9.2e-23	-0.157952	0.073968	0.033	-0.211542	0.0435001	1.2e-06	-0.147795	0.0379094	9.7e-05	-0.151288	0.0577794	0.0088	0.00222128	0.0873042
5	rs6729692	2	27583099	AC074117.10		G	0.642301	0.960388	-0.0585263	0.00978785	2.2e-09					-0.0112954	0.0287429	0.69	-0.0738593	0.0169647	1.3e-05	-0.0783296	0.014772	1.1e-07	-0.0183601	0.0224704	0.41	-0.00235492	0.385757
6	rs780093	2	27742603	GCKR		T	0.380454	1	-0.0773442	0.00945773	2.9e-16	T	-0.065	0.0065	4.6e-23	-0.0327278	0.0277228	0.24	-0.0835827	0.01637	3.3e-07	-0.0990371	0.0142588	3.8e-12	-0.0430014	0.0216751	0.047	-0.00342453	0.117771
7	rs1367173	2	43449385	THADA		C	0.869858	0.982471	0.0942834	0.0137574	7.2e-12	T	-0.1	0.0099	2.7e-24	0.15205	0.0402411	0.00016	0.119762	0.0237761	4.7e-07	0.0747786	0.0206972	0.0003	0.0787871	0.0314399	0.012	-0.0244211	2.87403e-08
7	rs10196106	2	43571907	THADA		G	0.908015	0.841857	0.127997	0.0173478	1.6e-13					0.195518	0.0506584	0.00011	0.154673	0.0299453	2.4e-07	0.105053	0.0260691	5.6e-05	0.115236	0.0395889	0.0036	-0.026761	6.23285e-07
7	rs72879290	2	43633268	THADA		T	0.893605	0.996593	0.0972126	0.0149246	7.3e-11	T	0.12	0.011	4.6e-29	0.188287	0.0436331	1.6e-05	0.129812	0.0257826	4.8e-07	0.0722986	0.022434	0.0013	0.0746035	0.034084	0.029	-0.0378944	1.27667e-10
7	rs111239033	2	43842712	THADA	Y_RNA	G	0.923473	0.986653	0.11172	0.0173913	1.3e-10	A	-0.13	0.013	9.2e-25	0.194099	0.050785	0.00013	0.145019	0.0300241	1.4e-06	0.096427	0.0261219	0.00022	0.0772747	0.0396785	0.052	-0.0389414	4.30523e-08
8	rs6546151	2	65676583	AC012370.3	AC074391.1	G	0.593008	0.995128	0.054891	0.00934088	4.2e-09	A	-0.05	0.0065	1.9e-14	0.050522	0.0273915	0.065	0.0471332	0.0161694	0.0036	0.0632663	0.0140847	7.1e-06	0.050878	0.0214222	0.018	0.000118657	0.418561
9	rs10649609	2	165552706	COBLL1		A	0.630398	0.990932	0.0824254	0.00956421	6.8e-18					0.10047	0.0280427	0.00034	0.100217	0.0165571	1.4e-09	0.0889747	0.0144151	6.7e-10	0.0449826	0.0219202	0.04	-0.0184959	1.20455e-05
9	rs79953491	2	165555539	COBLL1		A	0.880944	1	0.0863179	0.014178	1.1e-09	A	0.085	0.0097	1.3e-18	0.0921251	0.0414502	0.026	0.0900984	0.0244883	0.00023	0.101519	0.0213485	2e-06	0.051427	0.0324127	0.11	-0.013566	0.948458
9	rs355828	2	165612741	COBLL1		C	0.390201	0.991252	0.0585829	0.00945463	5.8e-10	T	-0.048	0.0065	3.4e-13	0.0364807	0.0277393	0.19	0.0423344	0.0163731	0.0097	0.0646363	0.0142597	5.8e-06	0.0767253	0.0216777	0.0004	0.0134148	0.298385
10	rs777476498	2	227015884	AC080002.1	AC068138.1	CTCCTTTTCT	0.795364	0.995419	0.0680839	0.0114084	2.4e-09					0.060726	0.0333882	0.069	0.0655313	0.0197193	0.00089	0.0728507	0.0171815	2.2e-05	0.0715568	0.0261056	0.0061	0.00361024	0.39292
10	2:227036698_AT_A	2	227036698	AC080002.1	AC068138.1	AT	0.548383	0.984786	0.0571766	0.0092922	7.6e-10					0.0274821	0.0272454	0.31	0.0491882	0.0160826	0.0022	0.0704977	0.0140084	4.8e-07	0.0564039	0.021305	0.0081	0.00964059	0.91063
10	rs1399627	2	227083411	AC068138.1	MIR5702	A	0.346051	0.994739	-0.0823222	0.00968441	1.9e-17	A	-0.094	0.0066	2.3e-45	-0.0553109	0.0283571	0.051	-0.0809749	0.016748	1.3e-06	-0.0912963	0.0145923	3.9e-10	-0.0830013	0.0221799	0.00018	-0.00923011	0.428766
10	2:227156738_AT_A	2	227156738	AC068138.1	MIR5702	AT	0.365299	0.924741	-0.0687196	0.00991343	4.2e-12					-0.0268318	0.0290388	0.36	-0.067752	0.0171459	7.8e-05	-0.0781916	0.0149441	1.7e-07	-0.0704678	0.0227146	0.0019	-0.0145453	0.652709
10	rs13012754	2	227171148	MIR5702	AC068138.1	C	0.520412	0.865054	-0.069384	0.0098939	2.3e-12					-0.0225926	0.0290283	0.44	-0.081565	0.0171308	1.9e-06	-0.0658334	0.014927	1e-05	-0.0855806	0.0226984	0.00016	-0.020996	0.87748
10	2:227180734_CT_C	2	227180734	MIR5702	AC068138.1	CT	0.44741	0.893992	-0.062066	0.00977226	2.1e-10					-0.0517204	0.0286383	0.071	-0.060683	0.0169082	0.00033	-0.0702189	0.0147276	1.9e-06	-0.0575575	0.0223974	0.01	-0.00194571	0.290013
10	rs10804330	2	227185749	AC068138.1	MIR5702	T	0.570422	0.981383	0.0662203	0.00937339	1.6e-12	T	0.066	0.0064	2.7e-24	0.0443971	0.0274679	0.11	0.0653143	0.0162189	5.6e-05	0.0778037	0.0141326	3.7e-08	0.0487074	0.0214786	0.023	0.00143676	0.609538
11	rs73136795	3	12468410	PPARG		G	0.882641	0.967356	-0.0870867	0.0145037	1.9e-09	T	0.12	0.076	0.1	-0.110256	0.0426834	0.0098	-0.0438651	0.0251919	0.082	-0.0968621	0.0219188	9.9e-06	-0.128888	0.0333325	0.00011	-0.00621087	0.768666
12	rs71317817	3	23251515	UBE2E2		G	0.901992	0.994721	0.0897454	0.0154649	6.5e-09	A	-0.073	0.011	1e-11	-0.00898909	0.0451792	0.84	0.111359	0.0267136	3.1e-05	0.100405	0.0232765	1.6e-05	0.0728896	0.0353266	0.039	0.0272929	0.668128
12	rs1496653	3	23454790	UBE2E2		A	0.795784	0.998709	0.0734177	0.0113864	1.1e-10	A	0.071	0.0079	1.1e-19	0.01804	0.0333283	0.59	0.0763577	0.0196848	0.0001	0.0822977	0.0171514	1.6e-06	0.0689775	0.0260575	0.0081	0.0169792	0.168768
13	rs6446298	3	49860854	AC139451.1	TRAIP	T	0.331862	0.997514	-0.06095	0.00976408	4.3e-10	T	-0.039	0.0067	5.6e-09	-0.0822039	0.0286248	0.0041	-0.0864017	0.0168949	3.2e-07	-0.0592912	0.014713	5.6e-05	-0.0265308	0.0223799	0.24	0.0185577	1.12184e-05
14	3:49971887_GA_G	3	49971887	MON1A	RBM6	GA	0.451337	0.895601	-0.0582723	0.00975167	2.3e-09					-0.0616466	0.0286042	0.031	-0.0692813	0.0168866	4.1e-05	-0.0587991	0.0147047	6.4e-05	-0.0477622	0.0223649	0.033	0.00462815	0.00779713
15	rs796623870	3	50037202	RBM6		GA	0.456874	0.897498	-0.0557868	0.00972097	9.5e-09					-0.0657721	0.0285156	0.021	-0.0638517	0.0168338	0.00015	-0.0563963	0.0146578	0.00012	-0.0459667	0.0222996	0.039	0.00660179	0.00346725
16	rs73186444	3	122985413	SEC22A		A	0.774319	0.989783	0.0667024	0.0110367	1.5e-09	A	0.057	0.0079	3.9e-13	0.0337068	0.0323189	0.3	0.0588401	0.0190907	0.0021	0.0782516	0.01663	2.5e-06	0.0661021	0.02527	0.0089	0.0107984	0.515074
17	rs11708067	3	123065778	ADCY5		A	0.753799	1	0.0974137	0.0106592	6.3e-20	A	0.089	0.0076	1.3e-31	0.0901962	0.0312171	0.0039	0.0865376	0.0184351	2.7e-06	0.113045	0.0160589	1.9e-12	0.0855327	0.0244043	0.00046	-0.00155451	0.367427
17	rs4470442	3	123068024	ADCY5		G	0.551251	0.991574	0.0592448	0.00927344	1.7e-10	A	-0.049	0.0064	5.1e-14	0.0374789	0.0272192	0.17	0.0472674	0.0160665	0.0033	0.0819022	0.0139887	4.8e-09	0.0397093	0.0212705	0.062	0.000743474	0.288405
18	rs10513800	3	185480388	IGF2BP2		C	0.786569	0.998324	-0.0852254	0.0112172	3e-14	A	0.084	0.0076	3.5e-28	-0.0195978	0.0329987	0.55	-0.0752767	0.0194613	0.00011	-0.112915	0.0169431	2.7e-11	-0.0728162	0.0257996	0.0048	-0.0177395	0.826897
18	rs71320320	3	185487155	IGF2BP2		A	0.653667	0.979316	-0.0832505	0.00974128	1.3e-17	A	-0.08	0.0067	3.7e-32	-0.0376683	0.0286273	0.19	-0.0792248	0.0168893	2.7e-06	-0.113765	0.0146994	1e-14	-0.0505538	0.0223919	0.024	-0.00429519	0.0136185
18	rs796353824	3	185514421	IGF2BP2		A	0.687475	0.99303	-0.105897	0.00995587	2e-26					-0.0801528	0.029269	0.0062	-0.106512	0.0172658	6.9e-10	-0.128106	0.0150319	1.6e-17	-0.0790931	0.0228924	0.00055	0.000353244	0.000101881
18	rs11705701	3	185544309	IGF2BP2	TRA2B	G	0.563859	0.991019	-0.0638531	0.00931263	7.1e-12	A	0.062	0.0064	6.3e-22	-0.0437421	0.0273146	0.11	-0.0545147	0.0161222	0.00072	-0.0806948	0.0140404	9.1e-09	-0.0518021	0.0213561	0.015	-0.00268665	0.0435891
19	rs6777684	3	187741842	RP11-132N15.1	RP11-430L16.1	A	0.391254	0.98924	-0.0564743	0.00945905	2.4e-09	A	-0.06	0.0065	3.5e-20	-0.040031	0.0277444	0.15	-0.038953	0.0163749	0.017	-0.0635704	0.0142662	8.3e-06	-0.0717786	0.0216835	0.00093	-0.0105825	0.0579774
20	4:6258829_GA_G	4	6258829	RP11-1406H17.1	WFS1	GA	0.239061	0.914005	-0.0749396	0.0112517	2.7e-11					-0.0562142	0.0329387	0.088	-0.0707965	0.0194546	0.00027	-0.0703618	0.0169513	3.3e-05	-0.101412	0.0257536	8.2e-05	-0.0150661	0.179097
20	rs6830918	4	6263996	RP11-1406H17.1	WFS1	C	0.486792	0.961065	-0.074507	0.00935786	1.7e-15	T	0.073	0.0065	3.3e-29	-0.0845872	0.027466	0.0021	-0.0572572	0.0162131	0.00041	-0.0814974	0.0141184	7.8e-09	-0.083069	0.0214741	0.00011	0.000506063	0.314428
21	rs4996963	4	6276126	WFS1		G	0.543885	0.982632	-0.0666877	0.00929517	7.3e-13	A	0.067	0.0066	4.7e-24	-0.0848448	0.0272787	0.0019	-0.0531964	0.0161039	0.00096	-0.075081	0.0140201	8.5e-08	-0.0633769	0.0213245	0.003	0.00715596	0.0184744
21	rs62283057	4	6276805	WFS1		C	0.845581	0.991422	0.084077	0.0127735	4.6e-11	T	-0.074	0.0089	5.4e-17	0.029511	0.0373479	0.43	0.082709	0.0220821	0.00018	0.0871923	0.0192366	5.8e-06	0.0974589	0.0292245	0.00085	0.0226493	0.00519116
21	rs575994282	4	6286902	WFS1		A	0.589619	0.745517	-0.0663034	0.0107761	7.6e-10					-0.10345	0.0316574	0.0011	-0.0721695	0.0186821	0.00011	-0.0669867	0.0162635	3.8e-05	-0.0462179	0.0247399	0.062	0.0190774	0.00906473
21	rs5018646	4	6292758	WFS1		G	0.632685	0.712699	-0.0784802	0.0112703	3.3e-12					-0.0624566	0.0330862	0.059	-0.0613821	0.0195327	0.0017	-0.0794087	0.017007	3e-06	-0.110544	0.0258582	1.9e-05	-0.0160291	0.294666
21	rs376109082	4	6301325	WFS1		G	0.420051	0.967125	-0.0830211	0.00946275	1.7e-18					-0.0777427	0.0277556	0.0051	-0.0722797	0.0163884	1e-05	-0.086139	0.0142662	1.6e-09	-0.0945554	0.0216975	1.3e-05	-0.00560423	0.786407
21	rs1046319	4	6304286	WFS1		C	0.280105	0.995239	-0.0877731	0.0102475	1.1e-17	T	0.09	0.0071	1.1e-36	-0.0672137	0.0300136	0.025	-0.0713052	0.0177195	5.7e-05	-0.0924138	0.015441	2.2e-09	-0.110111	0.0234659	2.7e-06	-0.0142991	0.299727
21	rs9986109	4	6312976	PPP2R2C	WFS1	G	0.614237	0.946061	-0.0597511	0.00968547	6.9e-10	A	0.058	0.0068	3e-17	-0.0785569	0.02844	0.0057	-0.0500085	0.0167836	0.0029	-0.0542052	0.0146146	0.00021	-0.0832654	0.0222278	0.00018	-0.0015695	0.382807
21	rs7678675	4	6315368	WFS1	PPP2R2C	T	0.444947	0.992057	-0.0686166	0.00928192	1.4e-13	T	-0.077	0.0065	6.7e-32	-0.09937	0.0272336	0.00026	-0.0729212	0.0160761	5.7e-06	-0.0614999	0.0139989	1.1e-05	-0.0720091	0.0212932	0.00072	0.00912032	0.173207
21	rs7664465	4	6320070	WFS1	PPP2R2C	T	0.344448	0.992902	-0.0638034	0.00969037	4.6e-11	T	-0.068	0.0067	1.4e-23	-0.0740842	0.0284093	0.0091	-0.0573188	0.0167698	0.00063	-0.0574267	0.0146073	8.4e-05	-0.0885233	0.0222126	6.7e-05	-0.00481302	0.611583
21	rs6446491	4	6328354	PPP2R2C		G	0.527478	0.978682	-0.0582345	0.00928648	3.6e-10	C	0.061	0.0066	4.2e-20	-0.104323	0.0272452	0.00013	-0.0571665	0.0160849	0.00038	-0.0465682	0.0140049	0.00088	-0.0751456	0.021311	0.00042	0.00972586	0.68326
22	rs140265860	5	14786749	ANKH		T	0.987789	0.94711	0.267378	0.0428263	4.3e-10	T	0.2	0.032	1.1e-09	0.19114	0.123847	0.12	0.206641	0.073335	0.0048	0.296411	0.0640634	3.7e-06	0.294753	0.0969629	0.0024	0.0345376	0.778857
23	rs459193	5	55806751	AC022431.2		A	0.253198	1	-0.0622928	0.0105495	3.5e-09	A	-0.073	0.0073	4.4e-23	-0.0924921	0.0309109	0.0028	-0.0689539	0.0182488	0.00016	-0.0706247	0.015896	8.9e-06	-0.0215071	0.0241569	0.37	0.0236617	0.0028023
24	5:101488394_AAAT_A	5	101488394	CTD-2333K2.1	SLCO4C1	AAAT	0.940037	0.962576	-0.117584	0.0197246	2.5e-09					-0.200834	0.058159	0.00055	-0.129845	0.0342877	0.00015	-0.122617	0.0298516	4e-05	-0.0607273	0.0454902	0.18	0.0467024	4.25524e-05
25	rs116512981	5	101685644	RN7SKP68	SLCO6A1	T	0.967387	0.813166	-0.172073	0.0287079	2e-09	T	-0.16	0.02	1.9e-16	-0.314115	0.0848448	0.00021	-0.198553	0.0500091	7.2e-05	-0.196867	0.0434677	5.9e-06	-0.0410878	0.0664047	0.54	0.0910091	1.81655e-05
26	rs145762933	5	101870140	RP11-58B2.1	LINC00492	G	0.95006	0.98815	-0.134109	0.0212354	2.7e-10	A	0.15	0.015	7.1e-24	-0.240315	0.0626819	0.00013	-0.170403	0.0369463	4e-06	-0.135656	0.032161	2.5e-05	-0.0465511	0.0490303	0.34	0.0645881	1.64466e-07
27	rs72783884	5	102247916	PAM		A	0.988638	0.881207	-0.289775	0.0460983	3.3e-10	A	-0.25	0.034	1.4e-13	-0.139451	0.137199	0.31	-0.292634	0.0806583	0.00029	-0.380314	0.0699527	5.4e-08	-0.193026	0.107133	0.071	-0.0178584	0.773861
27	rs116782923	5	102331465	PAM		A	0.946194	0.995533	-0.151727	0.0204317	1.1e-13	A	-0.16	0.015	3.6e-29	-0.232508	0.0603884	0.00012	-0.199453	0.0355837	2.1e-08	-0.139069	0.0309788	7.1e-06	-0.0904107	0.0472218	0.055	0.0473656	2.91376e-06
28	rs148257233	5	102623315	CTD-2154H6.1	C5orf30	C	0.965141	0.835327	-0.169183	0.0273528	6.2e-10	T	0.19	0.019	2e-23	-0.287449	0.0807725	0.00037	-0.182357	0.0476321	0.00013	-0.14398	0.0414669	0.00052	-0.166037	0.0631249	0.0085	0.0404709	0.0295229
28	rs74944275	5	102726073	CTD-2154H6.1	C5orf30	C	0.953509	1	-0.135487	0.0218171	5.3e-10	T	0.14	0.016	3.1e-20	-0.225532	0.0643871	0.00046	-0.142998	0.0379745	0.00017	-0.134422	0.0330301	4.7e-05	-0.100061	0.0503398	0.047	0.0418238	0.0269406
29	rs9379084	6	7231843	RREB1		G	0.885284	0.93899	0.0950741	0.0148876	1.7e-10	A	-0.097	0.011	2.3e-20	0.0830739	0.043509	0.056	0.0626563	0.0256989	0.015	0.104763	0.0223948	2.9e-06	0.117293	0.0340211	0.00057	0.0114062	0.805347
30	rs4134975	6	20488894	E2F3		C	0.808282	0.986713	0.0678658	0.0117134	6.9e-09					0.00845255	0.0342926	0.81	0.0742626	0.0202584	0.00025	0.0864889	0.0176487	9.6e-07	0.0518819	0.0268161	0.053	0.0144764	0.586993
31	rs1012627	6	20576883	CDKAL1		G	0.633928	0.984433	-0.0613298	0.0095961	1.6e-10	A	0.085	0.0065	6.1e-39	-0.0752765	0.0281905	0.0076	-0.0650999	0.0166328	9.1e-05	-0.0568323	0.0144863	8.7e-05	-0.0690888	0.0220345	0.0017	0.00206255	0.260119
31	rs9465847	6	20634428	CDKAL1		G	0.831661	0.992274	-0.0810604	0.0123077	4.5e-11	T	0.088	0.0085	2e-25	-0.0928575	0.0362255	0.01	-0.0724238	0.0213692	0.0007	-0.0783237	0.0186077	2.6e-05	-0.104368	0.0282993	0.00023	-0.00383685	0.248355
31	rs7755830	6	20634886	CDKAL1		T	0.53178	0.991166	0.059157	0.00921893	1.4e-10	T	0.074	0.0063	1e-31	0.0574969	0.0270645	0.034	0.0442619	0.0159699	0.0056	0.0645424	0.0139113	3.5e-06	0.073319	0.0211545	0.00053	0.00527405	0.892414
31	6:20635719_AT_A	6	20635719	CDKAL1		AT	0.606415	0.98535	-0.0658769	0.00944415	3e-12					-0.0434106	0.0277742	0.12	-0.0480784	0.016384	0.0033	-0.0752552	0.0142639	1.3e-07	-0.0892233	0.0217023	3.9e-05	-0.0152709	0.0480343
31	rs547873402	6	20653849	CDKAL1		A	0.898229	0.840772	-0.118597	0.0165994	9e-13					-0.110618	0.0489319	0.024	-0.10079	0.0288536	0.00048	-0.11241	0.0251188	7.6e-06	-0.171833	0.0382135	6.9e-06	-0.020405	0.0420981
31	rs9358355	6	20654897	CDKAL1		T	0.830433	0.997252	-0.0915245	0.0122335	7.3e-14	T	-0.1	0.0085	5.6e-32	-0.0980147	0.0360187	0.0065	-0.0594325	0.0212566	0.0052	-0.0890088	0.0184952	1.5e-06	-0.149636	0.0281288	1e-07	-0.0172071	0.0137622
31	rs56676529	6	20661837	CDKAL1		C	0.860925	0.956711	-0.111581	0.0135437	1.7e-16					-0.114859	0.039921	0.004	-0.0819345	0.0235454	0.0005	-0.106644	0.0204926	1.9e-07	-0.176125	0.0311696	1.6e-08	-0.0204219	0.0159401
31	rs200499617	6	20666180	CDKAL1		A	0.473759	0.783881	0.0606951	0.0103948	5.3e-09					0.0297072	0.0305378	0.33	0.0328708	0.0180206	0.068	0.0585352	0.0156896	0.00019	0.123688	0.0238632	2.2e-07	0.0313268	0.0060448
31	rs12527373	6	20671282	CDKAL1		A	0.939818	0.978143	-0.123785	0.019514	2.2e-10					-0.154165	0.057585	0.0074	-0.10061	0.0339713	0.0031	-0.122171	0.0295445	3.5e-05	-0.166724	0.0449731	0.00021	-0.00418656	0.248745
31	rs1012635	6	20675295	CDKAL1		A	0.521683	0.993463	0.0674633	0.00922291	2.6e-13	A	0.08	0.0063	7.7e-37	0.0881768	0.0270674	0.0011	0.0596124	0.0159715	0.00019	0.0624404	0.0139163	7.2e-06	0.0869695	0.0211564	3.9e-05	-0.000402431	0.56273
31	rs754953005	6	20682783	CDKAL1		AATGAGATCTCGTGATAACTCTAT	0.82696	0.984363	-0.127974	0.0122315	1.3e-25					-0.153948	0.0360656	2e-05	-0.0925897	0.021274	1.3e-05	-0.131179	0.0185098	1.4e-12	-0.177507	0.0281698	2.9e-10	-0.00785285	0.139578
31	rs9368222	6	20686996	CDKAL1		C	0.735752	1	-0.109928	0.0104086	4.5e-26	A	0.14	0.0071	1.4e-85	-0.0977102	0.0306758	0.0014	-0.0889742	0.0180836	8.6e-07	-0.110016	0.0157443	2.8e-12	-0.156952	0.0239569	5.6e-11	-0.0197472	0.146655
31	rs562579797	6	20701127	CDKAL1		G	0.757684	0.886542	-0.115357	0.0113545	3e-24					-0.0847452	0.0334513	0.011	-0.0999506	0.0197186	4e-07	-0.117021	0.0171679	9.3e-12	-0.158462	0.0261266	1.3e-09	-0.0245722	0.0756604
31	rs6928012	6	20728513	CDKAL1		C	0.399128	0.991236	0.058004	0.0094063	7e-10	T	-0.059	0.0064	1.1e-19	0.104057	0.0276175	0.00016	0.0572487	0.0162986	0.00044	0.050419	0.0141972	0.00038	0.0622901	0.0215814	0.0039	-0.0139221	0.140786
31	rs7741604	6	20731524	CDKAL1		A	0.863798	1	-0.102108	0.0133675	2.2e-14	A	-0.099	0.0092	4.5e-27	-0.126583	0.039409	0.0013	-0.108529	0.0232332	3e-06	-0.0838847	0.0202275	3.4e-05	-0.140041	0.0307702	5.3e-06	-0.00448613	0.351195
31	rs2745929	6	20754761	CDKAL1		T	0.504378	0.996631	0.0589226	0.00920982	1.6e-10	T	0.074	0.0063	1.8e-31	0.064385	0.0270468	0.017	0.0636093	0.0159567	6.7e-05	0.0513922	0.013901	0.00022	0.0763295	0.0211419	0.00031	0.00398148	0.652927
31	rs531904726	6	20838168	CDKAL1		T	0.707636	0.938017	-0.0611719	0.0103989	4e-09					-0.120293	0.0305632	8.3e-05	-0.0624718	0.0180346	0.00053	-0.0531639	0.0157042	0.00071	-0.0579188	0.0238911	0.015	0.0207915	0.0265587
32	rs6976381	7	15048814	AC006458.3	AC006045.3	T	0.468212	0.999771	-0.058059	0.00922514	3.1e-10	T	-0.064	0.0063	1.3e-23	-0.109579	0.0270444	5.1e-05	-0.0657281	0.0159701	3.9e-05	-0.0569568	0.0139054	4.2e-05	-0.0361934	0.0211462	0.087	0.0244619	5.51784e-06
33	rs10275989	7	28159696	JAZF1		C	0.351499	0.999657	0.0587335	0.00961461	1e-09	T	-0.061	0.0066	4.2e-20	0.0230717	0.028226	0.41	0.0454407	0.0166631	0.0064	0.0692159	0.0145043	1.8e-06	0.0730108	0.0220624	0.00093	0.0166464	0.00114552
33	rs35830575	7	28164765	JAZF1		C	0.53974	0.895676	0.0585013	0.00973339	1.8e-09					0.0566741	0.0285586	0.047	0.0351159	0.0168623	0.037	0.0713252	0.0146796	1.2e-06	0.0719672	0.0223256	0.0013	0.0050977	0.16769
33	rs1635851	7	28187806	JAZF1		C	0.416752	0.999723	0.0739413	0.00930563	1.9e-15	T	-0.079	0.0064	3.7e-34	0.0398538	0.0273116	0.14	0.0736652	0.016124	4.9e-06	0.0851289	0.014033	1.3e-09	0.066996	0.0213517	0.0017	0.0090474	0.680372
33	rs1708302	7	28198677	JAZF1		C	0.499614	0.999138	0.0810713	0.00918077	1e-18	T	-0.092	0.0063	4.2e-48	0.0502345	0.0269202	0.062	0.0770836	0.0158982	1.2e-06	0.0935104	0.0138365	1.4e-11	0.0777046	0.0210479	0.00022	0.0091567	0.560618
33	rs849333	7	28219812	JAZF1		A	0.341987	0.995773	0.0647208	0.00968085	2.3e-11					0.0451063	0.028427	0.11	0.0529202	0.0167761	0.0016	0.0753988	0.0146009	2.4e-07	0.0722767	0.0222217	0.0011	0.00905681	0.604373
34	rs11780890	8	41496536	NKX6-3	AGPAT6	A	0.836124	0.985649	0.0854325	0.012487	7.8e-12	A	0.084	0.009	1e-20	0.066927	0.0365219	0.067	0.0920036	0.0215738	2e-05	0.0875944	0.0188026	3.2e-06	0.0851127	0.0285593	0.0029	0.00606189	0.296179
34	rs13262861	8	41508577	NKX6-3		C	0.826505	0.974264	0.0917039	0.0122797	8.1e-14	A	-0.094	0.0087	1.8e-27	0.101904	0.0359008	0.0045	0.0914011	0.0212066	1.6e-05	0.0999914	0.0184818	6.3e-08	0.0815014	0.0280692	0.0037	-0.00680078	0.445492
35	rs508419	8	41522991	RP11-930P14.1		A	0.240433	0.995924	-0.0856189	0.0107748	1.9e-15	A	-0.079	0.0075	1.2e-25	-0.0703426	0.0315283	0.026	-0.0891061	0.0186266	1.7e-06	-0.0882022	0.016227	5.5e-08	-0.0918449	0.0246528	0.00019	-0.00716744	0.482658
36	rs2439826	8	41525387	ANK1		A	0.427756	0.993465	-0.0552796	0.00930355	2.8e-09	A	-0.044	0.0064	1e-11	-0.0483373	0.0272917	0.077	-0.0582715	0.016111	0.0003	-0.059527	0.0140335	2.2e-05	-0.0579417	0.0213434	0.0066	-0.00320145	0.372728
36	rs35489575	8	41553469	ANK1		G	0.850124	0.936649	0.0768093	0.0132653	7e-09					0.0721602	0.038801	0.063	0.096146	0.0229306	2.8e-05	0.0764259	0.0199665	0.00013	0.0709551	0.0303359	0.019	-0.000401693	0.123061
37	rs3802177	8	118185025	SLC30A8		G	0.689595	1	0.089648	0.00995481	2.1e-19	A	-0.11	0.0069	6.3e-55	0.103976	0.0291534	0.00036	0.11118	0.0172187	1.1e-10	0.092167	0.0149965	7.9e-10	0.0570724	0.0227879	0.012	-0.0156345	5.82489e-05
37	rs2466294	8	118185063	SLC30A8		C	0.499587	0.996122	0.0684132	0.00921125	1.1e-13	C	0.069	0.0064	6.4e-27	0.0878353	0.0270225	0.0012	0.0936812	0.0159557	4.3e-09	0.0619533	0.0138913	8.2e-06	0.0458895	0.0211214	0.03	-0.0139819	4.71035e-06
38	rs56951566	8	118216746	SNORA31	SLC30A8	G	0.449722	0.975127	-0.0556342	0.00933951	2.6e-09					-0.0661071	0.0273979	0.016	-0.054398	0.0161678	0.00077	-0.0658822	0.0140848	2.9e-06	-0.0369179	0.0214094	0.084	0.00972974	0.52181
39	rs1063192	9	22003367	CDKN2B-AS1		G	0.446767	1	-0.0546445	0.00924683	3.4e-09	A	0.058	0.0064	2.9e-19	-0.0775771	0.0271201	0.0042	-0.053295	0.0160082	0.00087	-0.0549737	0.0139387	8e-05	-0.0507653	0.0212025	0.017	0.00893725	0.00316229
39	rs10757281	9	22127613	RP11-408N14.1	CDKN2B-AS1	C	0.869802	0.906256	0.0854006	0.0142753	2.2e-09	T	-0.11	0.01	2.5e-27	0.0609372	0.0417382	0.14	0.0957542	0.0246684	0.0001	0.0843534	0.0214753	8.6e-05	0.0841338	0.0326333	0.01	0.00773221	0.0133322
39	rs7020996	9	22129579	CDKN2B-AS1	RP11-408N14.1	C	0.868798	1	0.119072	0.0136191	2.3e-18	T	-0.15	0.0098	3.5e-52	0.0672043	0.039763	0.091	0.135149	0.0235086	9e-09	0.102965	0.0204673	4.9e-07	0.150784	0.0311045	1.3e-06	0.0278599	0.509999
39	rs2383208	9	22132076	RP11-408N14.1	CDKN2B-AS1	A	0.822198	1	0.129808	0.0120275	3.7e-27	A	0.16	0.0085	1.9e-75	0.104174	0.0351439	0.003	0.148289	0.0207622	9.2e-13	0.106535	0.0180833	3.8e-09	0.166987	0.0274887	1.2e-09	0.0209375	0.153001
39	rs543011685	9	22134490	CDKN2B-AS1	RP11-408N14.1	C	0.787005	0.861679	0.096794	0.0120679	1.1e-15					0.0807109	0.0352947	0.022	0.104369	0.0208509	5.6e-07	0.0827882	0.0181562	5.1e-06	0.125475	0.0276092	5.5e-06	0.0149212	0.598709
39	rs7018475	9	22137685	RP11-408N14.1	CDKN2B-AS1	T	0.74337	1	-0.0836812	0.0105339	2e-15	T	-0.11	0.0072	6.3e-48	-0.0743116	0.0309778	0.016	-0.0975276	0.0182687	9.4e-08	-0.0703426	0.0159214	1e-05	-0.10619	0.0242012	1.1e-05	-0.0106261	0.00216578
39	rs10811663	9	22139220	RP11-408N14.1	CDKN2B-AS1	G	0.912611	0.827426	0.108391	0.0177981	1.1e-09	A	-0.13	0.012	1.6e-26	0.0307124	0.0519296	0.55	0.13688	0.0307238	8.4e-06	0.0826297	0.0267439	0.002	0.153478	0.0406441	0.00016	0.0409218	0.868264
40	rs7021934	9	84307734	RP11-154D17.1		A	0.630822	0.987955	-0.0553795	0.00954207	6.5e-09	A	-0.056	0.0066	6.6e-17	-0.0373482	0.0280279	0.18	-0.05833	0.0165409	0.00042	-0.0647201	0.0144058	7e-06	-0.0386628	0.0219032	0.077	-0.000438206	0.374427
40	rs2796441	9	84308948	RP11-154D17.1		G	0.579165	1	0.0619963	0.00928186	2.4e-11	A	-0.066	0.0065	8.5e-24	0.0354561	0.0272248	0.19	0.0835194	0.0160769	2e-07	0.0674187	0.0140006	1.5e-06	0.0321468	0.0212798	0.13	-0.0011031	0.0294606
40	rs576542482	9	84315496	RP11-154D17.1		T	0.615665	0.926567	0.0588156	0.0097765	1.8e-09					0.0345536	0.0286756	0.23	0.0865927	0.016935	3.2e-07	0.0589814	0.0147468	6.3e-05	0.0298328	0.0224111	0.18	-0.00157361	0.0643202
41	rs61386106	9	139246768	GPSM1		G	0.248955	0.992244	-0.0629172	0.0106557	3.5e-09					-0.0793203	0.0312077	0.011	-0.0594785	0.018426	0.0012	-0.07673	0.0160589	1.8e-06	-0.0365986	0.0243972	0.13	0.0142406	0.435419
42	rs7895525	10	12250620	CDC123		T	0.756205	0.991843	-0.0749863	0.0107384	2.9e-12	T	-0.069	0.0073	7.7e-21	-0.113315	0.0315659	0.00033	-0.0675289	0.0186286	0.00029	-0.0641991	0.0162172	7.5e-05	-0.107239	0.024669	1.4e-05	0.00202548	0.560792
43	rs10906111	10	12302357	RN7SL232P	CDC123	C	0.719338	0.994009	-0.0594807	0.0102406	6.3e-09	T	0.064	0.007	1e-19	-0.0673913	0.0300817	0.025	-0.0657999	0.0177523	0.00021	-0.0519341	0.0154618	0.00078	-0.0787448	0.023516	0.00081	-0.00378448	0.14534
44	rs7394200	10	12321633	RN7SL198P	RN7SL232P	T	0.810373	0.992518	-0.0737595	0.0117598	3.6e-10	T	-0.084	0.0081	1e-25	-0.108815	0.0345796	0.0017	-0.0635675	0.0204005	0.0018	-0.0648899	0.0177665	0.00026	-0.102867	0.0270269	0.00014	0.00198257	0.334058
45	rs703994	10	80926036	ZMIZ1		T	0.449152	0.998184	0.0571668	0.00924978	6.4e-10	T	0.046	0.0065	3.2e-12	0.0373168	0.0271634	0.17	0.0458353	0.0160293	0.0042	0.0652867	0.0139584	2.9e-06	0.0640636	0.0212307	0.0025	0.0089156	0.793317
45	rs780148	10	80935083	ZMIZ1		G	0.480546	0.93629	0.0694886	0.00949658	2.5e-13	C	-0.062	0.0067	6.6e-20	0.0431155	0.0278498	0.12	0.0777983	0.0164421	2.2e-06	0.0856651	0.014322	2.2e-09	0.0322829	0.0217635	0.14	-0.00361089	0.271515
45	rs703983	10	80941885	ZMIZ1		A	0.585164	0.995208	0.0731598	0.00933321	4.6e-15	A	0.067	0.0065	8.1e-25	0.0728141	0.0273638	0.0078	0.0720594	0.016153	8.2e-06	0.0884465	0.0140729	3.3e-10	0.0401788	0.0213876	0.06	-0.0108784	0.0507184
45	rs1613299	10	80954785	ZMIZ1		C	0.633728	0.992172	-0.0742242	0.00956601	8.6e-15	T	0.072	0.0067	1.3e-26	-0.021472	0.0280918	0.44	-0.0688062	0.0165795	3.3e-05	-0.0932671	0.0144361	1e-10	-0.0585912	0.0219601	0.0076	-0.0123731	0.569585
45	rs148412215	10	80961945	ZMIZ1		A	0.50423	0.983111	-0.0546757	0.00925079	3.4e-09					-0.0197187	0.0271264	0.47	-0.0512386	0.0160122	0.0014	-0.080028	0.0139464	9.6e-09	-0.0143867	0.0212122	0.5	0.00177734	0.684056
45	rs942796	10	80967220	ZMIZ1		C	0.564302	0.989531	-0.058282	0.00930884	3.8e-10	T	0.057	0.0065	2e-18	-0.0613518	0.0273189	0.025	-0.0613716	0.0161197	0.00014	-0.0665046	0.0140393	2.2e-06	-0.0350866	0.0213531	0.1	0.00875508	4.67629e-06
45	rs2802363	10	80988837	ZMIZ1		A	0.625792	0.988373	-0.0632686	0.00953692	3.3e-11	A	-0.06	0.0067	8.5e-19	-0.0155806	0.0280037	0.58	-0.0658216	0.0165216	6.8e-05	-0.084602	0.0143872	4.1e-09	-0.0302506	0.0218924	0.17	-0.00489001	0.0690213
45	rs1250595	10	80998350	ZMIZ1		G	0.531823	0.981419	-0.0567688	0.00927171	9.2e-10	A	0.047	0.0065	7.6e-13	-0.0609913	0.027211	0.025	-0.0553909	0.0160597	0.00056	-0.0670351	0.0139848	1.6e-06	-0.0349187	0.0212695	0.1	0.00869086	3.45165e-05
45	rs1250597	10	81010250	ZMIZ1		A	0.400772	0.994399	-0.0557722	0.00939442	2.9e-09	A	-0.045	0.0065	9.3e-12	-0.0306701	0.0275501	0.27	-0.0615151	0.0162677	0.00016	-0.0710783	0.0141689	5.3e-07	-0.0231446	0.0215443	0.28	0.0025085	0.520523
46	10:94218247_GTTTTTTTTTTTTT_G	10	94218247	IDE		GTTTTTTTTTTTTT	0.395381	0.950072	0.0596551	0.00964158	6.1e-10					0.0260684	0.0282999	0.36	0.0570815	0.0166989	0.00063	0.073201	0.0145469	4.9e-07	0.0445105	0.0221306	0.044	0.00614735	0.581209
46	rs568972134	10	94236914	IDE		A	0.657096	0.972115	0.0726991	0.0098248	1.4e-13					0.0669192	0.0287885	0.02	0.0617241	0.0169947	0.00028	0.0832709	0.0148108	1.9e-08	0.0686546	0.0225104	0.0023	0.000578473	0.834822
46	rs34459034	10	94259246	IDE		G	0.76574	0.980208	0.0706166	0.0109618	1.2e-10	A	-0.086	0.0076	1.9e-29	0.0492425	0.0320923	0.12	0.0481072	0.0189483	0.011	0.0851388	0.0165215	2.6e-07	0.0860359	0.0250975	0.00061	0.0122645	0.0727428
46	rs66937891	10	94336349	IDE	KIF11	C	0.406797	0.97053	0.064689	0.00947303	8.6e-12					0.0516323	0.027807	0.063	0.0532848	0.0164108	0.0012	0.0782352	0.0142954	4.4e-08	0.0542985	0.0217389	0.013	0.000888731	0.788617
46	rs796829743	10	94341829	IDE	KIF11	T	0.53	0.956106	0.0628217	0.00939902	2.3e-11					0.0315693	0.0275703	0.25	0.0555418	0.0162734	0.00064	0.0702535	0.0141767	7.2e-07	0.0632276	0.021558	0.0034	0.0105528	0.803096
46	10:94365239_AT_A	10	94365239	KIF11		AT	0.46235	0.957966	0.0623042	0.00940235	3.4e-11					0.0345035	0.0275846	0.21	0.0521753	0.0162866	0.0014	0.0757859	0.0141864	9.2e-08	0.0593504	0.021571	0.0059	0.00828231	0.445772
46	rs770698062	10	94366347	KIF11		A	0.577578	0.993099	0.0748971	0.00934438	1.1e-15					0.0758564	0.0273885	0.0056	0.0578182	0.0161691	0.00035	0.0868932	0.0140883	6.9e-10	0.0692062	0.0214179	0.0012	-0.00221672	0.435848
46	rs111366757	10	94369054	KIF11		A	0.685879	0.87772	0.0653971	0.0105609	5.9e-10					0.0116729	0.0309382	0.71	0.0559686	0.0182687	0.0022	0.0764372	0.0159173	1.6e-06	0.0779566	0.0242035	0.0013	0.0220946	0.00488491
47	10:94433461_CTT_C	10	94433461	HHEX	EIF2S2P3	CTT	0.365555	0.927001	-0.0732766	0.00989986	1.3e-13					-0.0534596	0.0290251	0.066	-0.0706013	0.017125	3.7e-05	-0.0800096	0.0149272	8.3e-08	-0.0685739	0.0226892	0.0025	-0.00503809	0.280345
47	rs10522178	10	94447096	HHEX		T	0.64587	0.908587	-0.0644576	0.0100724	1.6e-10					-0.0561874	0.0295971	0.058	-0.0423293	0.0174633	0.015	-0.0689709	0.015209	5.8e-06	-0.086764	0.0231329	0.00018	-0.0101922	0.154003
47	rs553279686	10	94462579	HHEX	Y_RNA	G	0.516126	0.970185	0.0669595	0.00932073	6.8e-13					0.0602553	0.0273443	0.028	0.0547415	0.0161376	0.00069	0.0830175	0.0140598	3.5e-09	0.0541673	0.0213767	0.011	-0.00202936	0.406911
47	rs10882102	10	94466495	Y_RNA	HHEX	G	0.591962	0.997125	0.0837712	0.00936357	3.7e-19	C	-0.11	0.0065	1.9e-60	0.0745699	0.027442	0.0066	0.0748988	0.0161956	3.7e-06	0.0954548	0.014118	1.4e-11	0.0732996	0.0214565	0.00064	-0.00042344	0.102812
47	rs11187146	10	94478355	Y_RNA	EXOC6	G	0.868081	0.971128	0.0860774	0.0137576	3.9e-10	C	-0.096	0.0096	1.4e-23	0.0218538	0.0401964	0.59	0.0825604	0.0237577	0.00051	0.100124	0.0207071	1.3e-06	0.0921566	0.0314509	0.0034	0.0234343	0.0918588
47	rs2488075	10	94490174	EXOC6	Y_RNA	T	0.503316	0.996176	-0.0636019	0.00921335	5.1e-12	T	-0.081	0.0063	6.3e-37	-0.0570485	0.0270227	0.035	-0.0520318	0.0159505	0.0011	-0.0798153	0.0138965	9.3e-09	-0.0435255	0.0211264	0.039	0.00450767	0.323995
48	rs545572	10	114597109	RP11-57H14.3	RP11-57H14.4	G	0.601942	0.983297	0.054386	0.00945973	9e-09	A	-0.077	0.0067	2e-30	0.0681159	0.0277429	0.014	0.0498624	0.0163816	0.0023	0.0583664	0.0142671	4.3e-05	0.0522596	0.0216872	0.016	-0.00528544	0.185861
48	rs113397277	10	114650787	RP11-57H14.3		T	0.959851	0.862973	-0.177046	0.025093	1.7e-12					-0.0936031	0.0743033	0.21	-0.234291	0.0437069	8.3e-08	-0.153774	0.0380736	5.4e-05	-0.207044	0.0580021	0.00036	-0.0378136	0.645612
48	rs17746916	10	114704781	RP11-57H14.3	TCF7L2	C	0.932771	0.913883	-0.137713	0.0191286	6.1e-13	T	-0.076	0.0079	3.6e-22	-0.0909278	0.0564937	0.11	-0.172618	0.0332756	2.1e-07	-0.118011	0.0289955	4.7e-05	-0.162393	0.044122	0.00023	-0.0238219	0.163799
48	rs720785	10	114721568	TCF7L2		G	0.768806	0.924501	-0.0889695	0.0112806	3.1e-15	C	0.11	0.0077	5.2e-45	-0.113314	0.0331716	0.00064	-0.0979996	0.0195713	5.5e-07	-0.0757748	0.0170439	8.8e-06	-0.104785	0.0259333	5.4e-05	0.00284325	0.00294606
48	rs720784	10	114721671	TCF7L2		A	0.639148	0.910063	-0.0752387	0.00998156	4.8e-14	A	-0.096	0.0069	1.5e-43	-0.0633489	0.0292871	0.031	-0.0739028	0.0172952	1.9e-05	-0.0718679	0.0150604	1.8e-06	-0.0905734	0.0228997	7.7e-05	-0.00907483	0.0930024
48	rs7901275	10	114732906	TCF7L2		A	0.551021	0.997348	-0.0866328	0.00924041	6.9e-21	A	-0.11	0.0064	2.3e-69	-0.0473991	0.0271017	0.08	-0.0898086	0.0160075	2e-08	-0.0871096	0.0139375	4.1e-10	-0.100657	0.0211927	2e-06	-0.0177525	0.0689645
48	rs11196175	10	114736614	TCF7L2		T	0.717945	1	-0.152873	0.0102037	9.6e-51	T	-0.17	0.0071	1.3e-129	-0.127894	0.0300266	2.1e-05	-0.146816	0.0177064	1.1e-16	-0.161128	0.0154245	1.5e-25	-0.160497	0.0234829	8.4e-12	-0.0108677	0.248133
48	rs7080591	10	114740617	TCF7L2		C	0.394107	0.99619	-0.111692	0.00942331	2.1e-32	T	0.12	0.0065	1.1e-73	-0.0368737	0.0275867	0.18	-0.113245	0.0162975	3.7e-12	-0.114251	0.0141996	8.5e-16	-0.137914	0.0215786	1.7e-10	-0.0336799	0.056954
48	rs7079711	10	114745788	TCF7L2		G	0.820274	0.921791	0.117574	0.0124347	3.2e-21	A	-0.15	0.0088	2e-62	0.111218	0.036351	0.0022	0.0801196	0.0214684	0.00019	0.127239	0.0187105	1e-11	0.144636	0.0284302	3.6e-07	0.0111396	0.0841551
48	rs11196180	10	114748029	TCF7L2		A	0.624461	0.981606	-0.131719	0.00956752	4e-43	A	-0.13	0.0066	9.4e-91	-0.132522	0.0281183	2.4e-06	-0.141155	0.0165867	1.7e-17	-0.13884	0.0144478	7.3e-22	-0.109584	0.0219854	6.2e-07	0.00764596	0.00219728
48	rs11196181	10	114749018	TCF7L2		G	0.939889	1	0.136605	0.0193688	1.8e-12	A	-0.15	0.013	4.8e-30	0.0858241	0.0564087	0.13	0.0970773	0.0333502	0.0036	0.148751	0.0290911	3.2e-07	0.17263	0.0441449	9.2e-05	0.0289353	0.712693
48	rs11196182	10	114750157	TCF7L2		C	0.855917	0.984617	0.132793	0.0131789	7e-24	T	-0.15	0.0092	7.5e-62	0.114302	0.0384579	0.003	0.112726	0.0227248	7e-07	0.143316	0.0198175	4.8e-13	0.142184	0.0300902	2.3e-06	0.00929415	0.301144
48	rs180988137	10	114751173	TCF7L2		A	0.989004	0.894571	-0.298576	0.046327	1.2e-10	A	-0.32	0.034	1.5e-21	-0.221785	0.138073	0.11	-0.233028	0.0812893	0.0041	-0.306443	0.0705121	1.4e-05	-0.415246	0.107584	0.00011	-0.064487	0.101411
48	rs58064715	10	114751986	TCF7L2		G	0.91002	0.992659	-0.0996828	0.0160956	5.9e-10	A	0.15	0.011	5.1e-38	-0.136592	0.0474909	0.004	-0.0857664	0.027997	0.0022	-0.0933511	0.0243599	0.00013	-0.127764	0.0371137	0.00058	0.0029426	0.0127391
48	rs116859590	10	114752410	TCF7L2		C	0.973432	1	-0.210379	0.0286042	1.9e-13	T	0.24	0.021	3.7e-29	-0.277262	0.0846613	0.0011	-0.16536	0.049937	0.00093	-0.271038	0.0433268	4e-10	-0.123389	0.0662368	0.063	0.051291	0.112352
48	rs149692182	10	114752674	TCF7L2		C	0.97823	0.988006	-0.199674	0.0315641	2.5e-10	T	0.29	0.022	3.2e-37	-0.070789	0.0938006	0.45	-0.163198	0.0551762	0.0031	-0.21276	0.0479651	9.2e-06	-0.273919	0.0731796	0.00018	-0.06771	0.672779
48	rs7903146	10	114758349	TCF7L2		C	0.707383	1	-0.286292	0.0100852	2.9e-177	T	0.31	0.0069	0	-0.256974	0.0297886	6.3e-18	-0.280858	0.017554	1.3e-57	-0.305102	0.0152791	1e-88	-0.287355	0.0232888	5.7e-35	-0.0101268	2.1352e-05
48	rs10885402	10	114761697	TCF7L2		A	0.543367	0.994935	-0.160067	0.00923681	2.8e-67	A	-0.17	0.0064	1.1e-160	-0.162081	0.02712	2.3e-09	-0.16059	0.0160045	1.1e-23	-0.168462	0.0139429	1.3e-33	-0.147434	0.0211997	3.6e-12	0.00488235	0.000315238
48	rs140908036	10	114770644	TCF7L2		G	0.986142	0.898368	-0.313764	0.0413071	3.1e-14	A	0.3	0.028	3e-26	-0.0792086	0.123281	0.52	-0.254695	0.0724209	0.00044	-0.389738	0.0628336	5.5e-10	-0.359631	0.0961222	0.00018	-0.0934742	0.00673555
48	rs774274514	10	114775205	TCF7L2		CT	0.558258	0.842059	-0.112962	0.010064	3.1e-29					-0.123342	0.0295501	3e-05	-0.116309	0.0174387	2.6e-11	-0.112109	0.0151881	1.6e-13	-0.111048	0.0230946	1.5e-06	0.00409795	0.0114511
48	rs180726800	10	114784926	TCF7L2		C	0.983346	0.892227	-0.243573	0.0378089	1.2e-10	T	0.26	0.025	9.9e-26	-0.219692	0.11232	0.05	-0.131117	0.0662448	0.048	-0.315169	0.0574047	4e-08	-0.29572	0.0877352	0.00075	-0.0253427	0.406445
48	rs140820620	10	114787948	TCF7L2		G	0.976282	0.920938	-0.259568	0.0313605	1.3e-16	A	0.28	0.022	4.8e-36	-0.198356	0.0932698	0.033	-0.262791	0.0548367	1.6e-06	-0.220582	0.0477664	3.9e-06	-0.380133	0.0727467	1.8e-07	-0.0605925	0.795289
48	10:114791239_CT_C	10	114791239	TCF7L2		CT	0.609562	0.91527	-0.164606	0.00979902	2.5e-63					-0.103717	0.0288226	0.00032	-0.152271	0.0170051	3.4e-19	-0.188569	0.0148016	3.5e-37	-0.162272	0.0225346	6.1e-13	-0.0195185	0.492848
48	rs116369954	10	114793572	TCF7L2		T	0.967829	1	-0.236022	0.0260599	1.3e-19	T	-0.29	0.018	2.1e-56	-0.196859	0.0774185	0.011	-0.296753	0.045515	7e-11	-0.214564	0.0396278	6.1e-08	-0.248161	0.0604131	4e-05	-0.0171007	0.0747932
48	rs142827301	10	114796424	TCF7L2		C	0.790299	0.979458	-0.267098	0.0113599	3e-122					-0.21701	0.0336231	1.1e-10	-0.254899	0.0198065	6.6e-38	-0.298155	0.0172189	3.6e-67	-0.259118	0.0262797	6.3e-23	-0.014036	0.123668
48	rs55771704	10	114810962	TCF7L2		C	0.507322	0.818425	0.0593434	0.0100865	4e-09					0.0577581	0.0296018	0.051	0.0777034	0.0174725	8.7e-06	0.0537631	0.0152148	0.00041	0.0478317	0.023142	0.039	-0.00330881	0.00332194
48	rs118069047	10	114818481	TCF7L2		G	0.931669	0.961446	0.11006	0.0185078	2.7e-09	A	-0.12	0.013	1.3e-18	0.0975415	0.0540397	0.071	0.10279	0.031926	0.0013	0.108539	0.0278408	9.7e-05	0.134758	0.0422972	0.0014	0.0124056	0.986571
48	rs35519679	10	114818754	TCF7L2		G	0.746393	0.973	-0.204786	0.0106697	4.2e-82	A	0.22	0.0074	3e-199	-0.146303	0.0314842	3.4e-06	-0.178284	0.0185593	7.5e-22	-0.225254	0.0161498	3.2e-44	-0.231129	0.0246009	5.8e-21	-0.0282753	0.638061
48	rs35936842	10	114818772	TCF7L2		G	0.593587	0.980615	-0.100017	0.00943387	2.9e-26	A	0.11	0.0065	3.4e-67	-0.0873572	0.027708	0.0016	-0.0840917	0.0163501	2.7e-07	-0.112596	0.0142386	2.6e-15	-0.0994188	0.0216557	4.4e-06	-0.00402055	0.86497
48	rs12245680	10	114820191	TCF7L2		T	0.892702	1	-0.103348	0.0148319	3.2e-12	T	-0.15	0.01	9.5e-45	-0.0501794	0.0437116	0.25	-0.0705292	0.0257811	0.0062	-0.111725	0.0224322	6.3e-07	-0.15594	0.0341532	5e-06	-0.0352535	0.803168
48	rs61872790	10	114821527	TCF7L2		A	0.84903	0.975227	-0.197879	0.0129606	1.2e-52	A	-0.22	0.0091	7.4e-128	-0.149451	0.0383385	9.7e-05	-0.192355	0.0225793	1.6e-17	-0.228258	0.0196357	3.1e-31	-0.170564	0.0299707	1.3e-08	-0.00703778	0.130807
48	rs7086355	10	114822735	TCF7L2		G	0.835471	0.964856	0.0944572	0.0125959	6.4e-14	C	-0.098	0.0087	2e-29	0.0120869	0.0368152	0.74	0.0712885	0.0217569	0.0011	0.107765	0.0189608	1.3e-08	0.130612	0.0288137	5.9e-06	0.0395085	0.00167516
48	rs57543781	10	114824224	TCF7L2		T	0.458909	0.919218	-0.0673985	0.00958727	2.1e-12	T	-0.044	0.0066	4.8e-11	0.00959344	0.0281156	0.73	-0.0566824	0.0166011	0.00064	-0.0859693	0.0144556	2.7e-09	-0.077626	0.021976	0.00041	-0.0290732	0.000107279
48	rs10885410	10	114824473	TCF7L2		G	0.728438	0.909464	0.095806	0.0108144	8.1e-19	A	-0.091	0.0074	1.5e-34	0.0173385	0.0316432	0.58	0.0661984	0.0186946	0.0004	0.107782	0.0162813	3.6e-11	0.145917	0.0247567	3.8e-09	0.0428594	8.00253e-06
48	rs142995398	10	114833403	TCF7L2		A	0.984204	0.811651	-0.263205	0.0407738	1.1e-10					-0.0411259	0.121275	0.73	-0.170672	0.0713673	0.017	-0.361556	0.0618577	5.1e-09	-0.286762	0.0946357	0.0025	-0.0818788	0.0232397
48	rs116929578	10	114836181	TCF7L2		A	0.958136	1	-0.131817	0.0229731	9.6e-09	A	-0.18	0.016	1.6e-28	-0.0680569	0.0678812	0.32	-0.148259	0.0399732	0.00021	-0.16899	0.0347613	1.2e-06	-0.0670296	0.0530434	0.21	0.000342422	0.110475
48	rs7069881	10	114838872	TCF7L2		C	0.65184	0.99544	0.0698812	0.00966285	4.8e-13	T	-0.07	0.0067	1.6e-25	0.0800104	0.0282992	0.0047	0.0720419	0.0167173	1.6e-05	0.0718006	0.0145611	8.2e-07	0.0644995	0.0221282	0.0036	-0.0051703	0.181054
48	rs749596	10	114847905	TCF7L2		T	0.791558	0.98518	0.100155	0.0113862	1.4e-18	A	-0.1	0.0081	1.1e-37	0.118431	0.0333086	0.00038	0.0970496	0.0196731	8.1e-07	0.107208	0.0171439	4e-10	0.0887106	0.0260441	0.00066	-0.00990686	0.455095
48	rs10885414	10	114861304	TCF7L2		A	0.688276	0.993339	0.0816197	0.00994442	2.3e-16	A	0.093	0.007	3.4e-40	0.0844185	0.0291382	0.0038	0.0842535	0.0172025	9.7e-07	0.0794937	0.0149864	1.1e-07	0.0871214	0.0227739	0.00013	0.00090096	0.253311
48	rs10885421	10	114916586	TCF7L2		G	0.405052	0.980428	-0.0620892	0.00941421	4.2e-11	T	0.068	0.0066	3e-24	-0.0706868	0.0275995	0.01	-0.0722887	0.0162952	9.2e-06	-0.0560427	0.0141866	7.8e-05	-0.0617955	0.0215763	0.0042	0.00296378	0.0948156
48	rs4081699	10	114920089	TCF7L2		A	0.782611	0.987669	0.069831	0.0111871	4.3e-10	A	0.057	0.0079	5.6e-13	0.0342698	0.0327552	0.3	0.0786977	0.0193456	4.7e-05	0.0779715	0.0168509	3.7e-06	0.0584415	0.0256074	0.023	0.00805723	0.550172
49	rs11592174	10	122904350	RP11-159H3.1	LINC01153	G	0.847393	0.974927	-0.077508	0.0129023	1.9e-09	C	0.045	0.009	6.4e-07	-0.124382	0.0379615	0.0011	-0.105478	0.0223915	2.5e-06	-0.0706375	0.0195093	0.00029	-0.0391836	0.0296971	0.19	0.0283994	1.01212e-08
50	rs163177	11	2838413	KCNQ1		T	0.506973	1	-0.0724325	0.00919053	3.2e-15					-0.0791725	0.0269669	0.0033	-0.0829906	0.0159126	1.8e-07	-0.0771132	0.0138623	2.7e-08	-0.0457393	0.0210802	0.03	0.0111444	0.00910352
50	rs2237895	11	2857194	KCNQ1		A	0.581147	1	-0.0793236	0.00930352	1.5e-17	A	-0.093	0.0066	3.6e-44	-0.086926	0.0273222	0.0015	-0.088194	0.0161156	4.4e-08	-0.0827329	0.0140441	3.8e-09	-0.0612184	0.0213525	0.0041	0.00856917	0.0491073
50	rs74046911	11	2858636	KCNQ1		C	0.958424	0.982714	0.194929	0.0234189	8.6e-17	T	-0.19	0.017	4.4e-31	0.115397	0.0680884	0.09	0.192034	0.0402845	1.9e-06	0.223447	0.0351551	2.1e-10	0.162642	0.0532712	0.0023	0.0157482	0.311937
51	rs7104177	11	17384230	NCR3LG1		C	0.488353	0.893797	0.0601719	0.00971183	5.8e-10					-0.000398293	0.0284901	0.99	0.0483942	0.0168215	0.004	0.0673371	0.0146445	4.3e-06	0.088648	0.0222647	6.9e-05	0.0296821	0.0152742
52	rs5213	11	17408404	KCNJ11		C	0.348272	0.995235	0.0712097	0.00967719	1.9e-13	T	-0.071	0.0066	1.9e-26	-0.00101768	0.028445	0.97	0.0545158	0.0167774	0.0012	0.0805351	0.0146113	3.6e-08	0.103835	0.0222277	3e-06	0.034951	0.000685684
53	rs77756118	11	72428038	ARAP1		T	0.776105	0.955058	0.0683901	0.0112451	1.2e-09	T	0.078	0.0079	2e-23	0.0924773	0.0329177	0.005	0.0682975	0.019446	0.00044	0.0800383	0.0169312	2.3e-06	0.0429203	0.025735	0.095	-0.016519	2.37453e-05
53	rs73541184	11	72428148	ARAP1		G	0.706533	0.979422	0.0596663	0.0101869	4.7e-09	A	-0.068	0.007	9.6e-22	0.0975234	0.0298406	0.0011	0.058128	0.0176245	0.00097	0.064325	0.0153437	2.8e-05	0.0424615	0.023331	0.069	-0.018354	0.00180238
53	11:72470915_GGTTT_G	11	72470915	STARD10	ARAP1	GGTTT	0.851026	0.97483	0.107137	0.0130391	2.1e-16					0.12164	0.0380917	0.0014	0.0956381	0.0225126	2.2e-05	0.121135	0.019616	6.6e-10	0.0926516	0.029792	0.0019	-0.0096627	0.275235
54	rs11375205	11	92690095	SNRPGP16	RP11-676F20.1	C	0.672531	0.949993	-0.057508	0.0100283	9.8e-09					-0.0360332	0.0294618	0.22	-0.0608909	0.0173818	0.00046	-0.0596348	0.0151355	8.1e-05	-0.0612223	0.0230216	0.0078	-0.00839637	0.48881
54	rs144683127	11	92695708	RP11-676F20.1	SNRPGP16	T	0.641162	0.972399	-0.0613301	0.00970433	2.6e-10					-0.0569624	0.0284983	0.046	-0.0632794	0.0168172	0.00017	-0.0683686	0.0146415	3e-06	-0.0528081	0.0222806	0.018	0.00138475	0.00646239
55	rs10830963	11	92708710	MTNR1B		C	0.72477	1	-0.0681918	0.0102845	3.3e-11	C	-0.099	0.0071	1.5e-43	-0.0563351	0.030226	0.062	-0.0619702	0.0178332	0.00051	-0.0952785	0.0155194	8.3e-10	-0.0303298	0.0236234	0.2	0.00866844	0.003053
56	rs75616205	12	4316171	RP11-320N7.1	CCND2-AS1	A	0.974366	0.921881	0.193437	0.0301635	1.4e-10	A	0.19	0.022	4.5e-19	0.232205	0.0876402	0.0081	0.248479	0.0519095	1.7e-06	0.256468	0.0452798	1.5e-08	-0.029956	0.0684129	0.66	-0.0873872	1.52631e-06
56	rs117233107	12	4328521	CCND2-AS1	RP11-320N7.1	G	0.984947	0.880683	0.285522	0.0399265	8.6e-13	A	-0.35	0.029	9.5e-34	0.365215	0.115532	0.0016	0.383092	0.0685215	2.3e-08	0.332039	0.0597308	2.7e-08	0.0149409	0.0901107	0.87	-0.116758	2.15814e-09
56	rs3217791	12	4384669	CCND2-AS1		C	0.924801	0.936657	0.12032	0.0179712	2.2e-11					0.125488	0.0524311	0.017	0.0874949	0.0309727	0.0047	0.115753	0.0270078	1.8e-05	0.167936	0.0410007	4.2e-05	0.0141492	0.929748
56	rs76895963	12	4384844	CCND2-AS1		T	0.979534	0.812109	0.450156	0.0358125	3.1e-36	T	0.48	0.027	5.3e-70	0.409821	0.102871	6.8e-05	0.524965	0.0611456	9e-18	0.466054	0.053316	2.3e-18	0.308577	0.0804833	0.00013	-0.0337481	7.9854e-05
57	rs7134682	12	66168151	RPSAP52		G	0.8791	0.96892	-0.0884683	0.0142665	5.6e-10	T	0.083	0.0099	5.6e-17	-0.104906	0.0420072	0.013	-0.0684737	0.024778	0.0057	-0.0861673	0.0215748	6.5e-05	-0.12549	0.0328238	0.00013	-0.00686129	0.437316
57	rs145663307	12	66199686	RPSAP52		G	0.93576	0.986391	-0.11449	0.0188404	1.2e-09	C	0.096	0.013	8.8e-13	-0.154288	0.0555548	0.0055	-0.110973	0.0327677	0.00071	-0.111305	0.0285121	9.5e-05	-0.127754	0.0434228	0.0033	0.00884455	0.288779
58	rs2258238	12	66221060	HMGA2		A	0.894478	0.988031	-0.115207	0.0150068	1.6e-14	A	-0.11	0.011	2e-25	-0.168138	0.0442354	0.00014	-0.112826	0.0260959	1.5e-05	-0.107041	0.0227105	2.4e-06	-0.133391	0.0345798	0.00011	0.0115822	0.0476565
58	12:66227193_GT_G	12	66227193	HMGA2		GT	0.786831	0.853255	-0.0734041	0.0121758	1.7e-09					-0.108708	0.035823	0.0024	-0.0613417	0.0211299	0.0037	-0.0818995	0.0183976	8.5e-06	-0.0744304	0.0280044	0.0079	0.011426	0.0433262
58	rs11410862	12	66273071	RP11-366L20.2	HMGA2	T	0.862243	0.968087	-0.0947984	0.0134817	2e-12					-0.106952	0.039706	0.0071	-0.0773534	0.0234261	0.00096	-0.097065	0.0203786	1.9e-06	-0.124993	0.0310191	5.6e-05	-0.00601365	0.460657
59	rs1215468	13	80707429	LINC00382	SPRY2	A	0.708481	0.985761	0.0741601	0.0101805	3.2e-13	A	0.081	0.007	1.6e-30	0.0937767	0.0298291	0.0017	0.0944323	0.0176181	8.3e-08	0.0728212	0.0153423	2.1e-06	0.0385942	0.0233167	0.098	-0.0183942	0.00151502
59	rs522317	13	80748130	LINC00382	SPRY2	C	0.565152	0.999372	-0.0570874	0.00929204	8.1e-10	T	0.049	0.0064	2e-14	-0.0722327	0.0272708	0.0081	-0.0567606	0.0160966	0.00042	-0.0641978	0.0140201	4.7e-06	-0.0359295	0.0213214	0.092	0.012101	0.0170842
60	rs8017808	14	38848419	RP11-96D24.1	RP11-14N4.1	G	0.756345	0.984039	0.0707112	0.0107873	5.6e-11	T	-0.041	0.0073	2.6e-08	0.0751824	0.0316025	0.017	0.0705374	0.0186527	0.00016	0.0765946	0.0162612	2.5e-06	0.0607411	0.0247156	0.014	-0.00481377	0.91612
60	rs34715063	15	38873115	RP11-275I4.2	RASGRP1	T	0.870919	0.988564	-0.0874526	0.0137998	2.3e-10	T	-0.076	0.01	3.3e-14	-0.0635427	0.0406538	0.12	-0.0575987	0.0239778	0.016	-0.109122	0.020859	1.7e-07	-0.0958062	0.0317677	0.0026	-0.0107545	0.796853
61	rs11394439	15	77839292	RP11-307C19.1	RP11-307C19.2	G	0.256417	0.977966	-0.0609596	0.0106201	9.5e-09					-0.0538085	0.0311155	0.084	-0.0894193	0.0183717	1.1e-06	-0.0488509	0.0159946	0.0023	-0.0532169	0.0243165	0.029	0.000197204	0.0055705
62	rs56094641	16	53806453	FTO		A	0.594763	0.999523	-0.0944429	0.00935795	6e-24	A	-0.12	0.0064	1e-77	-0.111747	0.0274883	4.8e-05	-0.13242	0.0162152	3.2e-16	-0.0887525	0.0141272	3.3e-10	-0.063364	0.0214843	0.0032	0.0161278	3.08816e-11
62	rs8044769	16	53839135	FTO		T	0.494055	1	-0.0675997	0.00905502	8.3e-14	T	-0.091	0.0063	2.1e-46	-0.103741	0.0265625	9.4e-05	-0.0915246	0.015678	5.3e-09	-0.0654808	0.0136552	1.6e-06	-0.0385183	0.0207617	0.064	0.0217408	5.75435e-08
62	rs1861867	16	53848561	FTO		A	0.401144	0.90876	-0.0705677	0.0097815	5.4e-13	A	-0.084	0.0067	1.3e-35	-0.0790986	0.0286812	0.0058	-0.116861	0.0169347	5.2e-12	-0.0569059	0.0147476	0.00011	-0.0450297	0.0224159	0.045	0.0113563	1.76205e-08
63	rs669696	16	69626136	NFAT5		C	0.587947	0.997435	0.0581366	0.0093517	5.1e-10					0.0561427	0.0273906	0.04	0.0702866	0.0161749	1.4e-05	0.0457759	0.0140909	0.0012	0.0695122	0.0214224	0.0012	0.00445652	0.134222
63	16:69668926_GTT_G	16	69668926	NFAT5		GTT	0.45534	0.854508	-0.059022	0.00999253	3.5e-09					-0.0520654	0.0292777	0.075	-0.0774249	0.0172892	7.5e-06	-0.0493762	0.0150616	0.001	-0.061344	0.0228951	0.0074	-0.00309289	0.271211
64	rs2304586	17	4098998	ANKFY1		A	0.68766	0.996375	-0.059808	0.00991497	1.6e-09	A	-0.053	0.0068	1.1e-14	-0.066584	0.0291319	0.022	-0.0518603	0.0171914	0.0026	-0.0716629	0.0149664	1.7e-06	-0.0459853	0.0227709	0.043	0.00686626	0.352778
65	rs11263761	17	36097775	HNF1B		G	0.483039	0.989898	0.0589773	0.00923461	1.7e-10	A	-0.07	0.0064	1.4e-27	0.0736933	0.0271084	0.0066	0.073315	0.0159958	4.6e-06	0.0652876	0.0139358	2.8e-06	0.0206951	0.021193	0.33	-0.0176661	0.0029852
66	rs4804833	19	7970635	MAP2K7		A	0.381767	1	0.0554873	0.009451	4.3e-09	A	0.047	0.0066	1.1e-12	0.0355253	0.0277498	0.2	0.0610202	0.0163729	0.00019	0.0602123	0.0142631	2.4e-05	0.0500398	0.0216967	0.021	0.00483816	0.138219
67	rs10420309	19	46150182	RN7SL836P	EML2	A	0.56219	0.984741	0.0615264	0.00930504	3.8e-11	A	0.06	0.0069	3.4e-18	0.0688721	0.0272948	0.012	0.0547511	0.0161091	0.00068	0.0671355	0.0140318	1.7e-06	0.0588304	0.0213398	0.0058	-0.00334723	0.31257
67	rs10411648	19	46161036	GIPR	RN7SL836P	T	0.747967	0.952768	-0.0750969	0.0108422	4.3e-12					-0.0798424	0.0318776	0.012	-0.0585387	0.018807	0.0019	-0.0826243	0.0163693	4.5e-07	-0.0869363	0.0249118	0.00048	-0.00236462	0.00615425
68	rs1412956	20	45557017	EYA2		A	0.573585	0.975304	-0.0552684	0.00937009	3.7e-09	A	-0.036	0.0064	1.6e-08	-0.0535468	0.0275005	0.052	-0.0489888	0.0162314	0.0025	-0.0585433	0.014137	3.5e-05	-0.0622746	0.0214944	0.0038	-0.00290927	0.498092
68	rs55966194	20	45599090	EYA2		C	0.716951	0.997955	0.0658129	0.0102074	1.1e-10	C	0.047	0.0071	7e-11	0.104364	0.0299108	0.00048	0.0809662	0.0176589	4.5e-06	0.0696821	0.0153798	5.9e-06	0.0298321	0.0233688	0.2	-0.0248441	0.0232807
69	rs74766656	22	46662497	TTC38	PKDREJ	A	0.897192	0.995287	-0.101036	0.0151702	2.7e-11	A	-0.049	0.011	2.9e-06	-0.151227	0.0446533	0.00071	-0.128399	0.0263434	1.1e-06	-0.10188	0.0229262	8.8e-06	-0.0577945	0.0349092	0.098	0.0311441	0.0104071

## Sheet: Supplementary Table 4
Supplementary Table 4: associations of SNPs identified in diabetes diagnosed before the age of 50 years in the different age groups
Results presented as the per-SNP change in risk in logodds together with the standard error (SE) and P-value (P). All p-values presented in the grey column are <5e-8.
									Overall GWAS			Look-up in DIAGRAM (PMID: 30297969)				Diagnosed before age 50 years			Diagnosed between age 50 and 60 years			Diagnosed between age 60 and 70 years			Diagnosed after age 70 years
Locus	rsID	Chromosome	Position	Mapped gene 1	Mapped gene 2	Effect allele	Effect allele frequenct	Imputation quality	Beta	SE	P	Effect allele	Beta	SE	P	Beta	SE	P	Beta	SE	P	Beta	SE	P	Beta	SE	P	Average difference between groups	P for interaction
1	rs4074720	10	114748497	TCF7L2		C	0.533078	0.983427	-0.157462	0.00927523	1.2e-64	T	0.17	0.0064	3e-157	-0.168163	0.0272343	6.6e-10	-0.161002	0.0160701	1.3e-23	-0.161043	0.0140008	1.3e-30	-0.148032	0.0212884	3.6e-12	0.00671047	1.64515e-05
1	rs72826075	10	114750500	TCF7L2		A	0.768501	0.985564	-0.263821	0.0109389	1.6e-128	A	-0.28	0.0075	1.16e-305	-0.255414	0.0323566	2.9e-15	-0.266314	0.01906	2.3e-44	-0.283423	0.0165838	1.7e-65	-0.245374	0.0252944	3e-22	0.0033467	7.59208e-05
1	rs4506565	10	114756041	TCF7L2		A	0.6858	1	-0.258733	0.00987504	2.6e-151	A	-0.29	0.0073	0	-0.259064	0.0291334	6e-19	-0.253151	0.0171734	3.5e-49	-0.274607	0.0149503	2.4e-75	-0.251383	0.0227786	2.6e-28	0.00256029	6.01851e-07

## Sheet: Supplementary Table 5
Supplementary Table 5: associations of SNPs identified in diabetes diagnosed between age 50 and 60 years in the different age groups
Results presented as the per-SNP change in risk in logodds together with the standard error (SE) and P-value (P). All p-values presented in the grey column are <5e-8.
									Overall GWAS			Look-up in DIAGRAM (PMID: 30297969)				Diagnosed before age 50 years			Diagnosed between age 50 and 60 years			Diagnosed between age 60 and 70 years			Diagnosed after age 70 years
Locus	rsID	Chromosome	Position	Mapped gene 1	Mapped gene 2	Effect allele	Effect allele frequenct	Imputation quality	Beta	SE	P	Effect allele	Beta	SE	P	Beta	SE	P	Beta	SE	P	Beta	SE	P	Beta	SE	P	Average difference between groups	P for interaction
1	rs10649609	2	165552706	COBLL1		A	0.630398	0.990932	0.0824254	0.00956421	6.8e-18					0.10047	0.0280427	0.00034	0.100217	0.0165571	1.4e-09	0.0889747	0.0144151	6.7e-10	0.0449826	0.0219202	0.04	-0.0184959	1.20455e-05
2	rs71320321	3	185519107	IGF2BP2		G	0.685604	0.998723	-0.105173	0.00991699	2.8e-26					-0.0797764	0.0291568	0.0062	-0.106382	0.0171988	6.2e-10	-0.127691	0.0149733	1.5e-17	-0.0765798	0.0228048	0.00079	0.00106553	6.19318e-05
3	rs3802177	8	118185025	SLC30A8		G	0.689595	1	0.089648	0.00995481	2.1e-19	A	-0.11	0.0069	6.3e-55	0.103976	0.0291534	0.00036	0.11118	0.0172187	1.1e-10	0.092167	0.0149965	7.9e-10	0.0570724	0.0227879	0.012	-0.0156345	5.82489e-05
3	rs2466294	8	118185063	SLC30A8		C	0.499587	0.996122	0.0684132	0.00921125	1.1e-13	C	0.069	0.0064	6.4e-27	0.0878353	0.0270225	0.0012	0.0936812	0.0159557	4.3e-09	0.0619533	0.0138913	8.2e-06	0.0458895	0.0211214	0.03	-0.0139819	4.71035e-06
4	rs7020996	9	22129579	RP11-408N14.1	CDKN2B-AS1	C	0.868798	1	0.119072	0.0136191	2.3e-18	T	-0.15	0.0098	3.5e-52	0.0672043	0.039763	0.091	0.135149	0.0235086	9e-09	0.102965	0.0204673	4.9e-07	0.150784	0.0311045	1.3e-06	0.0278599	0.509999
4	rs10965248	9	22132878	CDKN2B-AS1	RP11-408N14.1	T	0.823239	0.995444	0.129175	0.0120721	1e-26	T	0.16	0.0085	7e-77	0.108619	0.0352721	0.0021	0.150644	0.0208391	4.9e-13	0.105877	0.0181483	5.4e-09	0.16171	0.0275865	4.6e-09	0.017697	0.0490379
5	rs11196175	10	114736614	TCF7L2		T	0.717945	1	-0.152873	0.0102037	9.6e-51	T	-0.17	0.0071	1.3e-129	-0.127894	0.0300266	2.1e-05	-0.146816	0.0177064	1.1e-16	-0.161128	0.0154245	1.5e-25	-0.160497	0.0234829	8.4e-12	-0.0108677	0.248133
5	rs7080591	10	114740617	TCF7L2		C	0.394107	0.99619	-0.111692	0.00942331	2.1e-32	T	0.12	0.0065	1.1e-73	-0.0368737	0.0275867	0.18	-0.113245	0.0162975	3.7e-12	-0.114251	0.0141996	8.5e-16	-0.137914	0.0215786	1.7e-10	-0.0336799	0.056954
5	rs4073288	10	114747277	RP11-139K1.2		G	0.625084	0.980364	-0.131343	0.00957617	8.2e-43	A	0.13	0.0066	3.8e-91	-0.132592	0.0281439	2.5e-06	-0.14216	0.0166019	1.1e-17	-0.137573	0.0144612	1.8e-21	-0.109264	0.0220054	6.9e-07	0.00777603	0.0018436
5	rs7903146	10	114758349	TCF7L2		C	0.707383	1	-0.286292	0.0100852	2.9e-177	T	0.31	0.0069	0	-0.256974	0.0297886	6.3e-18	-0.280858	0.017554	1.3e-57	-0.305102	0.0152791	1e-88	-0.287355	0.0232888	5.7e-35	-0.0101268	2.1352e-05
5	rs10885402	10	114761697	TCF7L2		A	0.543367	0.994935	-0.160067	0.00923681	2.8e-67	A	-0.17	0.0064	1.1e-160	-0.162081	0.02712	2.3e-09	-0.16059	0.0160045	1.1e-23	-0.168462	0.0139429	1.3e-33	-0.147434	0.0211997	3.6e-12	0.00488235	0.000315238
5	rs774274514	10	114775205	TCF7L2		CT	0.558258	0.842059	-0.112962	0.010064	3.1e-29					-0.123342	0.0295501	3e-05	-0.116309	0.0174387	2.6e-11	-0.112109	0.0151881	1.6e-13	-0.111048	0.0230946	1.5e-06	0.00409795	0.0114511
5	10:114791239_CT_C	10	114791239	TCF7L2		CT	0.609562	0.91527	-0.164606	0.00979902	2.5e-63					-0.103717	0.0288226	0.00032	-0.152271	0.0170051	3.4e-19	-0.188569	0.0148016	3.5e-37	-0.162272	0.0225346	6.1e-13	-0.0195185	0.492848
5	rs116369954	10	114793572	TCF7L2		T	0.967829	1	-0.236022	0.0260599	1.3e-19	T	-0.29	0.018	2.1e-56	-0.196859	0.0774185	0.011	-0.296753	0.045515	7e-11	-0.214564	0.0396278	6.1e-08	-0.248161	0.0604131	4e-05	-0.0171007	0.0747932
5	rs142827301	10	114796424	TCF7L2		C	0.790299	0.979458	-0.267098	0.0113599	3e-122					-0.21701	0.0336231	1.1e-10	-0.254899	0.0198065	6.6e-38	-0.298155	0.0172189	3.6e-67	-0.259118	0.0262797	6.3e-23	-0.014036	0.123668
5	rs35519679	10	114818754	TCF7L2		G	0.746393	0.973	-0.204786	0.0106697	4.2e-82	A	0.22	0.0074	3e-199	-0.146303	0.0314842	3.4e-06	-0.178284	0.0185593	7.5e-22	-0.225254	0.0161498	3.2e-44	-0.231129	0.0246009	5.8e-21	-0.0282753	0.638061
5	rs61872790	10	114821527	TCF7L2		A	0.84903	0.975227	-0.197879	0.0129606	1.2e-52	A	-0.22	0.0091	7.4e-128	-0.149451	0.0383385	9.7e-05	-0.192355	0.0225793	1.6e-17	-0.228258	0.0196357	3.1e-31	-0.170564	0.0299707	1.3e-08	-0.00703778	0.130807
6	rs76895963	12	4384844	CCND2-AS1		T	0.979534	0.812109	0.450156	0.0358125	3.1e-36	T	0.48	0.027	5.3e-70	0.409821	0.102871	6.8e-05	0.524965	0.0611456	9e-18	0.466054	0.053316	2.3e-18	0.308577	0.0804833	0.00013	-0.0337481	7.9854e-05
7	rs9937521	16	53799296	FTO		C	0.577736	0.995669	-0.0911909	0.00932238	1.3e-22					-0.1264	0.0273735	3.9e-06	-0.135342	0.0161495	5.3e-17	-0.079011	0.0140711	2e-08	-0.0585347	0.0213969	0.0062	0.0226219	1.03355e-15
7	rs1861867	16	53848561	FTO		A	0.401144	0.90876	-0.0705677	0.0097815	5.4e-13	A	-0.084	0.0067	1.3e-35	-0.0790986	0.0286812	0.0058	-0.116861	0.0169347	5.2e-12	-0.0569059	0.0147476	0.00011	-0.0450297	0.0224159	0.045	0.0113563	1.76205e-08
8	rs72802342	16	75234872	CTRB2	RP11-331F4.1	C	0.923783	0.963666	0.0992979	0.0175777	1.6e-08	A	-0.13	0.012	1.3e-27	0.0547414	0.0513118	0.29	0.176392	0.030369	6.3e-09	0.0970602	0.0264368	0.00024	0.0186639	0.0401205	0.64	-0.0120258	8.22532e-06

## Sheet: Supplementary Table 6
Supplementary Table 6: associations of SNPs identified in diabetes diagnosed between age 60 and 70 years in the different age groups
Results presented as the per-SNP change in risk in logodds together with the standard error (SE) and P-value (P). All p-values presented in the grey column are <5e-8.
									Overall GWAS			Look-up in DIAGRAM (PMID: 30297969)				Diagnosed before age 50 years			Diagnosed between age 50 and 60 years			Diagnosed between age 60 and 70 years			Diagnosed after age 70 years
Locus	rsID	Chromosome	Position	Mapped gene 1	Mapped gene 2	Effect allele	Effect allele frequenct	Imputation quality	Beta	SE	P	Effect allele	Beta	SE	P	Beta	SE	P	Beta	SE	P	Beta	SE	P	Beta	SE	P	Average difference between groups	P for interaction
1	rs780093	2	27742603	GCKR		T	0.380454	1	-0.0773442	0.00945773	2.9e-16	T	-0.065	0.0065	4.6e-23	-0.0327278	0.0277228	0.24	-0.0835827	0.01637	3.3e-07	-0.0990371	0.0142588	3.8e-12	-0.0430014	0.0216751	0.047	-0.00342453	0.117771
2	rs10649609	2	165552706	COBLL1		A	0.630398	0.990932	0.0824254	0.00956421	6.8e-18					0.10047	0.0280427	0.00034	0.100217	0.0165571	1.4e-09	0.0889747	0.0144151	6.7e-10	0.0449826	0.0219202	0.04	-0.0184959	1.20455e-05
3	rs1399627	2	227083411	AC068138.1	MIR5702	A	0.346051	0.994739	-0.0823222	0.00968441	1.9e-17	A	-0.094	0.0066	2.3e-45	-0.0553109	0.0283571	0.051	-0.0809749	0.016748	1.3e-06	-0.0912963	0.0145923	3.9e-10	-0.0830013	0.0221799	0.00018	-0.00923011	0.428766
4	rs72964564	3	123054770	ADCY5		A	0.746716	0.990203	0.0953113	0.0106008	2.5e-19	A	0.086	0.0076	5.3e-29	0.089082	0.0310457	0.0041	0.0810837	0.0183362	9.8e-06	0.115179	0.0159713	5.5e-13	0.0802519	0.0242749	0.00094	-0.00294335	0.519435
4	rs4467387	3	123054889	ADCY5		C	0.468014	0.986847	-0.058252	0.00926247	3.2e-10	T	0.046	0.0064	7.4e-13	-0.0356435	0.02718	0.19	-0.0439402	0.0160462	0.0062	-0.0870112	0.0139706	4.7e-10	-0.0299883	0.0212482	0.16	0.00188507	0.106117
5	rs12636310	3	185469491	IGF2BP2		A	0.786632	0.99667	-0.0845607	0.0112254	5e-14	A	-0.083	0.0076	1.1e-27	-0.0182102	0.0330214	0.58	-0.0729701	0.0194754	0.00018	-0.112978	0.016954	2.7e-11	-0.0732862	0.0258164	0.0045	-0.0183587	0.90835
5	rs71320320	3	185487155	IGF2BP2		A	0.653667	0.979316	-0.0832505	0.00974128	1.3e-17	A	-0.08	0.0067	3.7e-32	-0.0376683	0.0286273	0.19	-0.0792248	0.0168893	2.7e-06	-0.113765	0.0146994	1e-14	-0.0505538	0.0223919	0.024	-0.00429519	0.0136185
5	rs5855072	3	185497552	IGF2BP2		T	0.685764	0.990643	-0.105825	0.00995799	2.2e-26					-0.0816983	0.0292747	0.0053	-0.105527	0.0172691	9.9e-10	-0.130059	0.0150348	5.1e-18	-0.0755319	0.0228982	0.00097	0.00205548	4.89472e-05
5	rs11705701	3	185544309	TRA2B	IGF2BP2	G	0.563859	0.991019	-0.0638531	0.00931263	7.1e-12	A	0.062	0.0064	6.3e-22	-0.0437421	0.0273146	0.11	-0.0545147	0.0161222	0.00072	-0.0806948	0.0140404	9.1e-09	-0.0518021	0.0213561	0.015	-0.00268665	0.0435891
6	rs4688982	4	6267001	WFS1	RP11-1406H17.1	C	0.432365	0.989965	-0.0784276	0.00930782	3.6e-17	T	0.078	0.0065	1.1e-32	-0.0892318	0.0273079	0.0011	-0.0539232	0.0161216	0.00082	-0.0885368	0.0140365	2.8e-10	-0.0887106	0.021348	3.3e-05	0.000173719	0.568131
6	rs4688988	4	6287456	WFS1		C	0.281925	0.996302	-0.0843232	0.0102195	1.6e-16	T	0.089	0.007	6.8e-37	-0.0540403	0.0299307	0.071	-0.0721263	0.0176726	4.5e-05	-0.0927435	0.0154001	1.7e-09	-0.0962012	0.0234001	3.9e-05	-0.0140536	0.404103
7	rs34499031	6	20676414	CDKAL1		T	0.73304	0.994525	-0.109135	0.0103987	9.1e-26					-0.0980559	0.03064	0.0014	-0.0857885	0.0180656	2e-06	-0.111304	0.0157278	1.5e-12	-0.154954	0.02393	9.4e-11	-0.018966	0.110507
7	rs754953005	6	20682783	CDKAL1		AATGAGATCTCGTGATAACTCTAT	0.82696	0.984363	-0.127974	0.0122315	1.3e-25					-0.153948	0.0360656	2e-05	-0.0925897	0.021274	1.3e-05	-0.131179	0.0185098	1.4e-12	-0.177507	0.0281698	2.9e-10	-0.00785285	0.139578
7	rs562579797	6	20701127	CDKAL1		G	0.757684	0.886542	-0.115357	0.0113545	3e-24					-0.0847452	0.0334513	0.011	-0.0999506	0.0197186	4e-07	-0.117021	0.0171679	9.3e-12	-0.158462	0.0261266	1.3e-09	-0.0245722	0.0756604
8	rs1635851	7	28187806	JAZF1		C	0.416752	0.999723	0.0739413	0.00930563	1.9e-15	T	-0.079	0.0064	3.7e-34	0.0398538	0.0273116	0.14	0.0736652	0.016124	4.9e-06	0.0851289	0.014033	1.3e-09	0.066996	0.0213517	0.0017	0.0090474	0.680372
8	rs1708302	7	28198677	JAZF1		C	0.499614	0.999138	0.0810713	0.00918077	1e-18	T	-0.092	0.0063	4.2e-48	0.0502345	0.0269202	0.062	0.0770836	0.0158982	1.2e-06	0.0935104	0.0138365	1.4e-11	0.0777046	0.0210479	0.00022	0.0091567	0.560618
9	rs35859536	8	118191475	SLC30A8	SNORA31	C	0.687396	0.995954	0.0881891	0.00994586	7.5e-19	T	-0.11	0.0069	1.2e-53	0.100154	0.029126	0.00058	0.108971	0.0172037	2.4e-10	0.0924727	0.0149831	6.7e-10	0.0535868	0.0227668	0.018	-0.0155225	5.56681e-05
10	rs34706136	9	4294707	GLIS3		T	0.648144	0.983639	-0.0503974	0.00969942	2e-07					-0.0260295	0.0284701	0.36	-0.0354834	0.0168052	0.035	-0.0850554	0.0146289	6.1e-09	-0.011602	0.0222613	0.6	0.00480917	0.174841
11	rs2383208	9	22132076	CDKN2B-AS1	RP11-408N14.1	A	0.822198	1	0.129808	0.0120275	3.7e-27	A	0.16	0.0085	1.9e-75	0.104174	0.0351439	0.003	0.148289	0.0207622	9.2e-13	0.106535	0.0180833	3.8e-09	0.166987	0.0274887	1.2e-09	0.0209375	0.153001
12	rs780148	10	80935083	ZMIZ1		G	0.480546	0.93629	0.0694886	0.00949658	2.5e-13	C	-0.062	0.0067	6.6e-20	0.0431155	0.0278498	0.12	0.0777983	0.0164421	2.2e-06	0.0856651	0.014322	2.2e-09	0.0322829	0.0217635	0.14	-0.00361089	0.271515
12	rs3915932	10	80941936	ZMIZ1		G	0.585199	0.995033	0.073063	0.00933318	5e-15	C	-0.068	0.0065	5.9e-25	0.0732131	0.027364	0.0075	0.0717984	0.0161531	8.8e-06	0.0885192	0.0140729	3.2e-10	0.0398498	0.0213877	0.062	-0.0111211	0.0473045
12	rs703965	10	80955067	ZMIZ1		C	0.546496	1	-0.0673714	0.00922356	2.8e-13	T	0.062	0.0065	2.3e-21	-0.0254311	0.0270863	0.35	-0.063382	0.0159819	7.3e-05	-0.0871012	0.0139164	3.9e-10	-0.0444112	0.0211679	0.036	-0.00632668	0.433285
12	rs34942927	10	80957391	ZMIZ1		A	0.682681	0.918488	-0.0769604	0.0103079	8.3e-14					-0.0312081	0.0302816	0.3	-0.0644536	0.0178706	0.00031	-0.102969	0.0155553	3.6e-11	-0.0527861	0.023675	0.026	-0.00719268	0.770267
12	10:80960591_ACATGTG_A	10	80960591	ZMIZ1		ACATGTG	0.483812	0.974392	-0.054743	0.00929186	3.8e-09					-0.0135034	0.0272474	0.62	-0.0471852	0.0160842	0.0033	-0.0819921	0.0140077	4.8e-09	-0.0186374	0.0213058	0.38	-0.00171131	0.931151
12	rs2802363	10	80988837	ZMIZ1		A	0.625792	0.988373	-0.0632686	0.00953692	3.3e-11	A	-0.06	0.0067	8.5e-19	-0.0155806	0.0280037	0.58	-0.0658216	0.0165216	6.8e-05	-0.084602	0.0143872	4.1e-09	-0.0302506	0.0218924	0.17	-0.00489001	0.0690213
13	rs11187019	10	94248310	IDE		A	0.451021	0.99218	0.0705598	0.00927751	2.8e-14	A	0.086	0.0064	3.3e-40	0.0405627	0.0272262	0.14	0.0637455	0.0160625	7.2e-05	0.0815972	0.0139982	5.6e-09	0.067393	0.0212861	0.0016	0.00894344	0.551621
14	rs770698062	10	94366347	KIF11		A	0.577578	0.993099	0.0748971	0.00934438	1.1e-15					0.0758564	0.0273885	0.0056	0.0578182	0.0161691	0.00035	0.0868932	0.0140883	6.9e-10	0.0692062	0.0214179	0.0012	-0.00221672	0.435848
15	rs553167039	10	94440536	EIF2S2P3	HHEX	C	0.615283	0.948045	0.0845257	0.00967883	2.5e-18					0.0725379	0.0283651	0.011	0.0780291	0.0167411	3.1e-06	0.0904524	0.0145928	5.7e-10	0.0858141	0.02218	0.00011	0.00442539	0.20668
15	rs553279686	10	94462579	Y_RNA	HHEX	G	0.516126	0.970185	0.0669595	0.00932073	6.8e-13					0.0602553	0.0273443	0.028	0.0547415	0.0161376	0.00069	0.0830175	0.0140598	3.5e-09	0.0541673	0.0213767	0.011	-0.00202936	0.406911
15	rs11187140	10	94466910	HHEX	Y_RNA	G	0.641116	0.990205	0.0859827	0.00962076	4e-19	A	-0.11	0.0066	3.2e-59	0.092832	0.0281895	0.00099	0.0665761	0.0166343	6.3e-05	0.102497	0.0145054	1.6e-12	0.0715606	0.0220394	0.0012	-0.00709045	0.0918588
15	rs61862780	10	94468643	HHEX	Y_RNA	T	0.507622	0.99483	-0.0621229	0.00922048	1.6e-11	T	-0.08	0.0063	1.4e-36	-0.0514797	0.0270473	0.057	-0.048436	0.0159644	0.0024	-0.0799125	0.0139082	9.2e-09	-0.0435346	0.0211447	0.04	0.00264837	0.520094
16	rs7901275	10	114732906	TCF7L2		A	0.551021	0.997348	-0.0866328	0.00924041	6.9e-21	A	-0.11	0.0064	2.3e-69	-0.0473991	0.0271017	0.08	-0.0898086	0.0160075	2e-08	-0.0871096	0.0139375	4.1e-10	-0.100657	0.0211927	2e-06	-0.0177525	0.0689645
16	rs11196175	10	114736614	TCF7L2		T	0.717945	1	-0.152873	0.0102037	9.6e-51	T	-0.17	0.0071	1.3e-129	-0.127894	0.0300266	2.1e-05	-0.146816	0.0177064	1.1e-16	-0.161128	0.0154245	1.5e-25	-0.160497	0.0234829	8.4e-12	-0.0108677	0.248133
16	rs7080591	10	114740617	TCF7L2		C	0.394107	0.99619	-0.111692	0.00942331	2.1e-32	T	0.12	0.0065	1.1e-73	-0.0368737	0.0275867	0.18	-0.113245	0.0162975	3.7e-12	-0.114251	0.0141996	8.5e-16	-0.137914	0.0215786	1.7e-10	-0.0336799	0.056954
16	rs7079711	10	114745788	TCF7L2		G	0.820274	0.921791	0.117574	0.0124347	3.2e-21	A	-0.15	0.0088	2e-62	0.111218	0.036351	0.0022	0.0801196	0.0214684	0.00019	0.127239	0.0187105	1e-11	0.144636	0.0284302	3.6e-07	0.0111396	0.0841551
16	rs11196180	10	114748029	TCF7L2		A	0.624461	0.981606	-0.131719	0.00956752	4e-43	A	-0.13	0.0066	9.4e-91	-0.132522	0.0281183	2.4e-06	-0.141155	0.0165867	1.7e-17	-0.13884	0.0144478	7.3e-22	-0.109584	0.0219854	6.2e-07	0.00764596	0.00219728
16	rs11196183	10	114750264	TCF7L2		G	0.85649	0.985147	0.13288	0.013201	7.8e-24	A	-0.15	0.0092	7.5e-62	0.111003	0.0385185	0.004	0.110624	0.0227612	1.2e-06	0.144654	0.0198502	3.2e-13	0.143762	0.0301392	1.8e-06	0.0109198	0.452322
16	rs7903146	10	114758349	TCF7L2		C	0.707383	1	-0.286292	0.0100852	2.9e-177	T	0.31	0.0069	0	-0.256974	0.0297886	6.3e-18	-0.280858	0.017554	1.3e-57	-0.305102	0.0152791	1e-88	-0.287355	0.0232888	5.7e-35	-0.0101268	2.1352e-05
16	rs140908036	10	114770644	TCF7L2		G	0.986142	0.898368	-0.313764	0.0413071	3.1e-14	A	0.3	0.028	3e-26	-0.0792086	0.123281	0.52	-0.254695	0.0724209	0.00044	-0.389738	0.0628336	5.5e-10	-0.359631	0.0961222	0.00018	-0.0934742	0.00673555
16	rs753617426	10	114772873	TCF7L2		GTT	0.554443	0.974871	-0.161345	0.00933868	7e-67					-0.154515	0.0274264	1.8e-08	-0.161691	0.0161836	1.7e-23	-0.170821	0.0140973	8.5e-34	-0.149835	0.0214388	2.8e-12	0.0015599	0.000712535
16	rs774274514	10	114775205	TCF7L2		CT	0.558258	0.842059	-0.112962	0.010064	3.1e-29					-0.123342	0.0295501	3e-05	-0.116309	0.0174387	2.6e-11	-0.112109	0.0151881	1.6e-13	-0.111048	0.0230946	1.5e-06	0.00409795	0.0114511
16	10:114791239_CT_C	10	114791239	TCF7L2		CT	0.609562	0.91527	-0.164606	0.00979902	2.5e-63					-0.103717	0.0288226	0.00032	-0.152271	0.0170051	3.4e-19	-0.188569	0.0148016	3.5e-37	-0.162272	0.0225346	6.1e-13	-0.0195185	0.492848
16	rs138732563	10	114792997	TCF7L2		T	0.976511	0.944676	-0.223495	0.0311602	7.3e-13					-0.328845	0.0922551	0.00036	-0.151201	0.0544571	0.0055	-0.308571	0.047196	6.2e-11	-0.110104	0.0722331	0.13	0.0729137	0.0697086
16	rs142827301	10	114796424	TCF7L2		C	0.790299	0.979458	-0.267098	0.0113599	3e-122					-0.21701	0.0336231	1.1e-10	-0.254899	0.0198065	6.6e-38	-0.298155	0.0172189	3.6e-67	-0.259118	0.0262797	6.3e-23	-0.014036	0.123668
16	rs35519679	10	114818754	TCF7L2		G	0.746393	0.973	-0.204786	0.0106697	4.2e-82	A	0.22	0.0074	3e-199	-0.146303	0.0314842	3.4e-06	-0.178284	0.0185593	7.5e-22	-0.225254	0.0161498	3.2e-44	-0.231129	0.0246009	5.8e-21	-0.0282753	0.638061
16	rs35936842	10	114818772	TCF7L2		G	0.593587	0.980615	-0.100017	0.00943387	2.9e-26	A	0.11	0.0065	3.4e-67	-0.0873572	0.027708	0.0016	-0.0840917	0.0163501	2.7e-07	-0.112596	0.0142386	2.6e-15	-0.0994188	0.0216557	4.4e-06	-0.00402055	0.86497
16	rs61872790	10	114821527	TCF7L2		A	0.84903	0.975227	-0.197879	0.0129606	1.2e-52	A	-0.22	0.0091	7.4e-128	-0.149451	0.0383385	9.7e-05	-0.192355	0.0225793	1.6e-17	-0.228258	0.0196357	3.1e-31	-0.170564	0.0299707	1.3e-08	-0.00703778	0.130807
16	rs57543781	10	114824224	TCF7L2		T	0.458909	0.919218	-0.0673985	0.00958727	2.1e-12	T	-0.044	0.0066	4.8e-11	0.00959344	0.0281156	0.73	-0.0566824	0.0166011	0.00064	-0.0859693	0.0144556	2.7e-09	-0.077626	0.021976	0.00041	-0.0290732	0.000107279
16	rs10885410	10	114824473	TCF7L2		G	0.728438	0.909464	0.095806	0.0108144	8.1e-19	A	-0.091	0.0074	1.5e-34	0.0173385	0.0316432	0.58	0.0661984	0.0186946	0.0004	0.107782	0.0162813	3.6e-11	0.145917	0.0247567	3.8e-09	0.0428594	8.00253e-06
16	rs142995398	10	114833403	TCF7L2		A	0.984204	0.811651	-0.263205	0.0407738	1.1e-10					-0.0411259	0.121275	0.73	-0.170672	0.0713673	0.017	-0.361556	0.0618577	5.1e-09	-0.286762	0.0946357	0.0025	-0.0818788	0.0232397
16	rs749596	10	114847905	TCF7L2		T	0.791558	0.98518	0.100155	0.0113862	1.4e-18	A	-0.1	0.0081	1.1e-37	0.118431	0.0333086	0.00038	0.0970496	0.0196731	8.1e-07	0.107208	0.0171439	4e-10	0.0887106	0.0260441	0.00066	-0.00990686	0.455095
17	rs163184	11	2847069	KCNQ1		T	0.521523	0.993918	-0.0722991	0.00921974	4.4e-15	T	-0.081	0.0065	2.3e-35	-0.0622591	0.027054	0.021	-0.0799888	0.0159632	5.4e-07	-0.0822707	0.0139072	3.3e-09	-0.0456206	0.021145	0.031	0.00554619	0.0530551
17	rs74046911	11	2858636	KCNQ1		C	0.958424	0.982714	0.194929	0.0234189	8.6e-17	T	-0.19	0.017	4.4e-31	0.115397	0.0680884	0.09	0.192034	0.0402845	1.9e-06	0.223447	0.0351551	2.1e-10	0.162642	0.0532712	0.0023	0.0157482	0.311937
18	rs9667947	11	72424634	ARAP1		T	0.8382	0.981411	0.0995346	0.0125517	2.2e-15	T	0.1	0.0087	1.2e-30	0.115901	0.0366735	0.0016	0.0823347	0.0216696	0.00014	0.1169	0.0188833	6e-10	0.0847899	0.0286789	0.0031	-0.0103703	0.551132
19	rs10830963	11	92708710	MTNR1B		C	0.72477	1	-0.0681918	0.0102845	3.3e-11	C	-0.099	0.0071	1.5e-43	-0.0563351	0.030226	0.062	-0.0619702	0.0178332	0.00051	-0.0952785	0.0155194	8.3e-10	-0.0303298	0.0236234	0.2	0.00866844	0.003053
20	rs76895963	12	4384844	CCND2-AS1		T	0.979534	0.812109	0.450156	0.0358125	3.1e-36	T	0.48	0.027	5.3e-70	0.409821	0.102871	6.8e-05	0.524965	0.0611456	9e-18	0.466054	0.053316	2.3e-18	0.308577	0.0804833	0.00013	-0.0337481	7.9854e-05
21	16:53822169_AT_A	16	53822169	FTO		AT	0.653916	0.9899	-0.0943975	0.00970596	2.3e-22					-0.0965252	0.0285233	0.00071	-0.128796	0.0168243	1.9e-14	-0.0933847	0.014657	1.9e-10	-0.0631905	0.0222948	0.0046	0.0111116	0.271211

## Sheet: Supplementary Table 7
Supplementary Table 7: associations of SNPs identified in diabetes diagnosed after age 70 years in the different age groups
Results presented as the per-SNP change in risk in logodds together with the standard error (SE) and P-value (P). All p-values presented in the grey column are <5e-8.
									Overall GWAS			Look-up in DIAGRAM (PMID: 30297969)				Diagnosed before age 50 years			Diagnosed between age 50 and 60 years			Diagnosed between age 60 and 70 years			Diagnosed after age 70 years
Locus	rsID	Chromosome	Position	Mapped gene 1	Mapped gene 2	Effect allele	Effect allele frequenct	Imputation quality	Beta	SE	P	Effect allele	Beta	SE	P	Beta	SE	P	Beta	SE	P	Beta	SE	P	Beta	SE	P	Average difference between groups	P for interaction
1	rs11390198	1	214098201	PROX1-AS1		T	0.599539	0.992257	0.0394869	0.00940865	2.7e-05					0.0190004	0.0275952	0.49	0.00124015	0.0162887	0.94	0.0257193	0.014186	0.07	0.124659	0.0215742	7.6e-09	0.0352196	1.78875e-06
2	rs9356743	6	20667688	CDKAL1		C	0.875391	0.984649	-0.12126	0.0139897	4.4e-18	T	0.14	0.0096	6.9e-47	-0.143542	0.0412602	0.0005	-0.0846818	0.0243399	0.0005	-0.115156	0.0211799	5.4e-08	-0.190887	0.0322157	3.1e-09	-0.0157814	0.0486021
2	rs35612982	6	20682622	CDKAL1		T	0.822694	0.999223	-0.124544	0.0120218	3.8e-25	T	-0.14	0.0083	5.5e-68	-0.150098	0.0354449	2.3e-05	-0.0871271	0.0209091	3.1e-05	-0.127302	0.0181911	2.6e-12	-0.176585	0.0276827	1.8e-10	-0.00882901	0.0584391
2	rs9368222	6	20686996	CDKAL1		C	0.735752	1	-0.109928	0.0104086	4.5e-26	A	0.14	0.0071	1.4e-85	-0.0977102	0.0306758	0.0014	-0.0889742	0.0180836	8.6e-07	-0.110016	0.0157443	2.8e-12	-0.156952	0.0239569	5.6e-11	-0.0197472	0.146655
2	rs562579797	6	20701127	CDKAL1		G	0.757684	0.886542	-0.115357	0.0113545	3e-24					-0.0847452	0.0334513	0.011	-0.0999506	0.0197186	4e-07	-0.117021	0.0171679	9.3e-12	-0.158462	0.0261266	1.3e-09	-0.0245722	0.0756604
3	rs2383208	9	22132076	RP11-408N14.1	CDKN2B-AS1	A	0.822198	1	0.129808	0.0120275	3.7e-27	A	0.16	0.0085	1.9e-75	0.104174	0.0351439	0.003	0.148289	0.0207622	9.2e-13	0.106535	0.0180833	3.8e-09	0.166987	0.0274887	1.2e-09	0.0209375	0.153001
4	rs11196175	10	114736614	TCF7L2		T	0.717945	1	-0.152873	0.0102037	9.6e-51	T	-0.17	0.0071	1.3e-129	-0.127894	0.0300266	2.1e-05	-0.146816	0.0177064	1.1e-16	-0.161128	0.0154245	1.5e-25	-0.160497	0.0234829	8.4e-12	-0.0108677	0.248133
4	rs7080591	10	114740617	TCF7L2		C	0.394107	0.99619	-0.111692	0.00942331	2.1e-32	T	0.12	0.0065	1.1e-73	-0.0368737	0.0275867	0.18	-0.113245	0.0162975	3.7e-12	-0.114251	0.0141996	8.5e-16	-0.137914	0.0215786	1.7e-10	-0.0336799	0.056954
4	rs7903146	10	114758349	TCF7L2		C	0.707383	1	-0.286292	0.0100852	2.9e-177	T	0.31	0.0069	0	-0.256974	0.0297886	6.3e-18	-0.280858	0.017554	1.3e-57	-0.305102	0.0152791	1e-88	-0.287355	0.0232888	5.7e-35	-0.0101268	2.1352e-05
4	rs753617426	10	114772873	TCF7L2		GTT	0.554443	0.974871	-0.161345	0.00933868	7e-67					-0.154515	0.0274264	1.8e-08	-0.161691	0.0161836	1.7e-23	-0.170821	0.0140973	8.5e-34	-0.149835	0.0214388	2.8e-12	0.0015599	0.000712535
4	10:114791239_CT_C	10	114791239	TCF7L2		CT	0.609562	0.91527	-0.164606	0.00979902	2.5e-63					-0.103717	0.0288226	0.00032	-0.152271	0.0170051	3.4e-19	-0.188569	0.0148016	3.5e-37	-0.162272	0.0225346	6.1e-13	-0.0195185	0.492848
4	rs142827301	10	114796424	TCF7L2		C	0.790299	0.979458	-0.267098	0.0113599	3e-122					-0.21701	0.0336231	1.1e-10	-0.254899	0.0198065	6.6e-38	-0.298155	0.0172189	3.6e-67	-0.259118	0.0262797	6.3e-23	-0.014036	0.123668
4	rs35519679	10	114818754	TCF7L2		G	0.746393	0.973	-0.204786	0.0106697	4.2e-82	A	0.22	0.0074	3e-199	-0.146303	0.0314842	3.4e-06	-0.178284	0.0185593	7.5e-22	-0.225254	0.0161498	3.2e-44	-0.231129	0.0246009	5.8e-21	-0.0282753	0.86497
4	rs10885410	10	114824473	TCF7L2		G	0.728438	0.909464	0.095806	0.0108144	8.1e-19	A	-0.091	0.0074	1.5e-34	0.0173385	0.0316432	0.58	0.0661984	0.0186946	0.0004	0.107782	0.0162813	3.6e-11	0.145917	0.0247567	3.8e-09	0.0428594	8.00253e-06

## Sheet: Supplementary Table 8
Supplementary Table 8: Replication results after meta-analyzing BioME and Estonian Biobanks
Results presented as the per-SNP change in risk in logodds together with the standard error (SE), P-value (P), and P-value for heterogeneity after meta-analysis with the discovery cohort (P_Het).
								Overall GWAS				Diagnosed before age 50 years				Diagnosed between age 50 and 60 years				Diagnosed between age 60 and 70 years				Diagnosed after age 70 years
Locus	rsID	Chromosome	Position	Mapped gene 1	Mapped gene 2	Effect allele	Effect allele frequenct	Beta	SE	P	P_Het	Beta	SE	P	P_Het	Beta	SE	P	P_Het	Beta	SE	P	P_Het	Beta	SE	P	P-Het	Average difference between groups
1	rs11390198	1	214098201	PROX1-AS1		T	0.552811	0.040985	0.0248129	0.098584	0.94	0.0103096	0.102187	0.919638	0.93	0.0154629	0.0536755	0.773284	0.804	0.0722087	0.0357713	0.0435265	0.234	0.0437855	0.0421148	0.298493	0.088	0.0111586
2	5:101488394_AAAT_A	5	101488394	CTD-2333K2.1	SLCO4C1	AAAT	0.936532	0.0429227	0.0524049	0.412752	0.0039	-0.107464	0.198068	0.587433	0.6487	-0.0245541	0.109604	0.822737	0.3619	-0.000254424	0.0754017	0.997308	0.1278	0.129572	0.0903677	0.15162	0.0577	0.0790119
3	rs116512981	5	101685644	RN7SKP68	SLCO6A1	T	0.970198	0.0560123	0.0777584	0.471317	0.0061	-0.138049	0.280812	0.622997	0.5488	0.022859	0.161425	0.88739	0.1879	0.103144	0.112658	0.359905	0.0131	0.0858134	0.135156	0.525481	0.398	0.0746208
4	rs145762933	5	101870140	RP11-58B2.1	LINC00492	G	0.94346	0.00587184	0.0560229	0.916525	0.0192	-0.178907	0.20308	0.378335	0.7741	0.00435467	0.117075	0.970329	0.1562	0.0107526	0.0799778	0.89305	0.088	0.0230355	0.0961912	0.810736	0.516	0.0673143
5	rs116782923	5	102331465	PAM		A	0.941436	-0.0616486	0.0554464	0.266199	0.1241	-0.248059	0.203954	0.223889	0.9438	-0.0803607	0.115622	0.487036	0.3272	-0.0673079	0.0794163	0.396699	0.3962	-0.0858036	0.0959329	0.371101	0.9701	0.0540852
6	rs148257233	5	102623315	CTD-2154H6.1	C5orf30	C	0.973397	0.0513812	0.0817297	0.529564	0.0108	-0.0835063	0.303936	0.783509	0.5188	-0.067258	0.1708	0.693741	0.5173	0.0437998	0.118229	0.711035	0.1323	0.128966	0.143212	0.36784	0.059	0.0708241
6	rs74944275	5	102726073	CTD-2154H6.1	C5orf30	C	0.971128	0.0692291	0.0743356	0.351696	0.0082	-0.0135281	0.281697	0.961698	0.4635	0.0652048	0.159232	0.682175	0.2033	0.0268977	0.106063	0.799803	0.147	0.0656302	0.130514	0.615063	0.2365	0.0263861
7	rs10811663	9	22139220	RP11-408N14.1	CDKN2B-AS1	G	0.928987	0.0597931	0.0522542	0.252511	0.383	0.0622009	0.196701	0.751835	0.8791	0.188278	0.109866	0.0865821	0.6554	0.0844598	0.0751034	0.260767	0.99	-0.0127362	0.0859859	0.882249	0.0814	-0.024979
8	rs180988137	10	114751173	TCF7L2		A	0.993898	-0.231193	0.163059	0.156234	0.6881	0.192662	0.941226	0.837812	0.6626	-0.428486	0.341889	0.2101	0.579	-0.390953	0.234309	0.0952088	0.7281	-0.000287889	0.273253	0.999159	0.1575	-0.0643168
8	rs116859590	10	114752410	TCF7L2		C	0.977901	-0.142096	0.0799434	0.0754938	0.4242	-0.0429801	0.354628	0.903534	0.5215	-0.338976	0.181088	0.0612219	0.3541	-0.170251	0.117627	0.147789	0.4213	-0.0183302	0.133501	0.89079	0.4821	0.00821661
8	rs149692182	10	114752674	TCF7L2		C	0.980323	-0.194943	0.0922856	0.0346535	0.9591	-0.264046	0.371551	0.477295	0.615	-0.155316	0.200793	0.439219	0.9694	-0.107058	0.133061	0.421065	0.4535	-0.462759	0.158407	0.00348544	0.2775	-0.0662375
8	rs140908036	10	114770644	TCF7L2		G	0.989192	-0.358029	0.122507	0.00347221	0.7343	-0.24235	0.502844	0.629836	0.7529	-0.31717	0.272941	0.245217	0.8262	-0.653384	0.175297	0.000193541	0.1574	-0.143664	0.222513	0.51851	0.3736	0.0328952
8	rs140820620	10	114787948	TCF7L2		G	0.987266	-0.268069	0.108884	0.0138179	0.9437	-0.0633144	0.465221	0.891746	0.7759	-0.0981471	0.247027	0.691136	0.5144	-0.417787	0.154272	0.00676663	0.222	-0.0947899	0.185376	0.609115	0.1519	-0.0104919
8	rs138732563	10	114792997	TCF7L2		T	0.978687	-0.15273	0.0850177	0.0724238	0.4391	0.0376938	0.378932	0.920762	0.3467	-0.394687	0.186158	0.0339918	0.2077	-0.164621	0.125048	0.188019	0.2809	-0.0069755	0.140291	0.960344	0.5129	-0.0148898
8	rs7086355	10	114822735	TCF7L2		G	0.759563	0.0683222	0.0299663	0.0226094	0.4265	0.0630832	0.115709	0.585625	0.6753	0.0722116	0.0641408	0.260238	0.9882	0.0687434	0.0430047	0.10993	0.4068	0.0573904	0.050384	0.254678	0.2005	-0.00189758
8	rs10885410	10	114824473	TCF7L2		G	0.635115	0.0594387	0.0262372	0.023486	0.19	0.0351099	0.103754	0.735065	0.8686	0.0237316	0.0562732	0.673229	0.4776	0.105222	0.038243	0.00593416	0.942	0.0165379	0.0447345	0.711613	0.0122	-0.00619067
8	rs142995398	10	114833403	TCF7L2		A	0.985912	-0.0377116	0.11322	0.739071	0.0612	-0.0708049	0.495649	0.886406	0.9531	-0.220711	0.245528	0.368694	0.8452	-0.260625	0.160831	0.105129	0.5583	0.290599	0.194921	0.136	0.0077	0.120468
9	rs75616205	12	4316171	RP11-320N7.1	CCND2-AS1	A	0.98039	0.0362791	0.0964498	0.706809	0.1185	0.0431309	0.373847	0.908152	0.6228	0.0906843	0.207435	0.661988	0.462	-0.0403292	0.136449	0.767564	0.0388	-0.034471	0.161906	0.831399	0.9818	-0.0258673
9	rs117233107	12	4328521	CCND2-AS1	RP11-320N7.1	G	0.988128	0.0982552	0.122972	0.424286	0.1461	0.0757284	0.49077	0.877369	0.5668	0.28905	0.274842	0.29294	0.7402	0.117546	0.175901	0.503975	0.2498	-0.151416	0.199672	0.448257	0.4491	-0.0757148

## Sheet: Supplementary Table 9
Supplementary Table 9: genetic correlations in the UK Biobank population
Results presented as the genetic correlation with the main outcome traits in the UK Biobank population. Estimates derived with LD score regression (ldsc.broadinstitute.org)
				Overall GWAS			Diagnosed before age 50 years			Diagnosed after age 70 years
trait	PMID	Category	ethnicity	Correlation estimate	SE	P	Correlation estimate	SE	P	Correlation estimate	SE	P
Fathers age at death	27015805	aging	European	-0.4503	0.071	2.2648e-10	-0.4734	0.1144	3.4801e-05	-0.506	0.1263	6.1852e-05
Mothers age at death	27015805	aging	European	-0.4672	0.0767	1.1169e-09	-0.6297	0.1295	1.166e-06	-0.3462	0.1367	0.0113
Parents age at death	27015805	aging	European	-0.5551	0.0925	1.9466e-09	-0.5066	0.1434	0.0004	-0.6171	0.1519	4.8797e-05
Birth weight	27680694	anthropometric	European	-0.2019	0.0389	2.1556e-07	-0.1295	0.0725	0.074	-0.24	0.0704	0.0006
Body mass index	20935630	anthropometric	European	0.4741	0.0346	1.0178e-42	0.5581	0.0655	1.5665e-17	0.3358	0.062	5.9746e-08
Child birth length	25281659	anthropometric	European	-0.15	0.0586	0.0105	-0.0966	0.122	0.4286	-0.3421	0.1253	0.0063
Child birth weight	23202124	anthropometric	European	-0.2461	0.0617	6.7088e-05	-0.2235	0.1151	0.0521	-0.4263	0.1387	0.0021
Childhood obesity	22484627	anthropometric	European	0.3921	0.0497	2.8512e-15	0.5022	0.0872	8.3024e-09	0.2482	0.0935	0.008
Extreme bmi	23563607	anthropometric	European	0.4687	0.0506	2.0884e-20	0.562	0.1011	2.7488e-08	0.2911	0.096	0.0024
Extreme height	23563607	anthropometric	European	-0.0708	0.0402	0.0786	-0.1422	0.0737	0.0538	-0.1037	0.0919	0.259
Extreme waist-to-hip ratio	23563607	anthropometric	European	0.3737	0.0689	5.8114e-08	0.3268	0.1321	0.0134	0.2984	0.1535	0.052
Height_2010	20881960	anthropometric	European	-0.0704	0.0272	0.0095	-0.0945	0.0458	0.0388	-0.0592	0.0599	0.3228
Hip circumference	25673412	anthropometric	European	0.3831	0.0388	5.817e-23	0.4435	0.0674	4.7996e-11	0.2843	0.0754	0.0002
Infant head circumference	22504419	anthropometric	European	-0.06	0.0674	0.3736	-0.0312	0.1141	0.7843	-0.2839	0.1412	0.0444
Obesity class 1	23563607	anthropometric	European	0.5216	0.0376	1.115e-43	0.5926	0.0695	1.4451e-17	0.3724	0.0723	2.6087e-07
Obesity class 2	23563607	anthropometric	European	0.5038	0.0429	8.5358e-32	0.5713	0.0813	2.0951e-12	0.3756	0.0747	5.0071e-07
Obesity class 3	23563607	anthropometric	European	0.4852	0.0596	3.9545e-16	0.5098	0.1166	1.2387e-05	0.4135	0.1089	0.0001
Offspring birth weight	31043758	anthropometric	European	0.0581	0.0403	0.1494	0.171	0.0881	0.0523	-0.078	0.0597	0.1914
Offspring birth weight	31043758	anthropometric	Mixed	-0.0125	0.0284	0.6594	0.074	0.0634	0.2426	-0.013	0.0844	0.8777
Offspring birth weight (maternal effect), adjusted for offspring genotype	31043758	anthropometric	European	-0.0194	0.029	0.5021	0.082	0.0656	0.2117	-0.0824	0.0615	0.1802
Overweight	23563607	anthropometric	European	0.5495	0.0383	1.04e-46	0.596	0.0716	8.5452e-17	0.3711	0.0691	7.9561e-08
Own birth weight	31043758	anthropometric	European	-0.1743	0.0329	1.2042e-07	-0.1336	0.0581	0.0216	-0.2082	0.0639	0.0011
Own birth weight	31043758	anthropometric	Mixed	-0.1684	0.0327	2.5691e-07	-0.1181	0.0564	0.0361	-0.1943	0.0624	0.0018
Own birth weight (fetal effect), adjusted for maternal genotype	31043758	anthropometric	European	-0.2355	0.0462	3.5084e-07	-0.2315	0.0795	0.0036	-0.2176	0.0906	0.0164
Sitting height ratio	25865494	anthropometric	European	0.0492	0.0553	0.3738	-0.1178	0.0903	0.1924	0.0033	0.1136	0.977
Waist circumference	25673412	anthropometric	European	0.5631	0.0308	7.7793e-75	0.547	0.0709	1.2179e-14	0.4601	0.0759	1.3332e-09
Waist-to-hip ratio	25673412	anthropometric	European	0.5588	0.0334	1.1188e-62	0.4741	0.0649	2.8065e-13	0.5016	0.066	2.9429e-14
Asthma	17611496	autoimmune	European	0.1379	0.0671	0.0398	0.0541	0.1151	0.6384	0.2262	0.1425	0.1125
Celiac disease	20190752	autoimmune	European	-0.1581	0.0638	0.0132	-0.1779	0.112	0.1124	-0.162	0.1382	0.2412
Crohns disease	26192919	autoimmune	European	0.0222	0.0397	0.5749	0.0223	0.0754	0.7676	0.005	0.0704	0.9436
Inflammatory Bowel Disease (Euro)	26192919	autoimmune	European	-0.0086	0.0386	0.8248	-0.0059	0.0746	0.9371	0.0065	0.0706	0.9265
Primary biliary cirrhosis	26394269	autoimmune	European	0.0795	0.0532	0.1351	0.1111	0.1014	0.2735	0.039	0.1009	0.6993
Rheumatoid Arthritis	24390342	autoimmune	European	0.0219	0.0392	0.5756	-0.0756	0.0682	0.2676	0.0706	0.0816	0.3866
Systemic lupus erythematosus	26502338	autoimmune	European	0.0648	0.0579	0.2629	0.0133	0.1022	0.8968	0.1483	0.0961	0.1229
Ulcerative colitis	26192919	autoimmune	European	-0.0511	0.0457	0.2632	-0.0128	0.0867	0.8825	-0.026	0.0916	0.7766
ICV	25607358	brain_volume	European	-0.149	0.0717	0.0376	-0.1803	0.1434	0.2085	-0.2132	0.1429	0.1356
Mean Caudate	25607358	brain_volume	European	0.0313	0.0597	0.6006	-0.2543	0.1138	0.0254	-0.099	0.1236	0.423
Mean Hippocampus	25607358	brain_volume	European	0.0602	0.0828	0.4671	0.1294	0.1536	0.3996	0.0627	0.1753	0.7206
Mean Pallidum	25607358	brain_volume	European	-0.0527	0.0816	0.518	-0.1937	0.1371	0.1577	0.1076	0.1439	0.4546
Mean Putamen	25607358	brain_volume	European	0.0032	0.0562	0.9553	0.0232	0.1106	0.8336	0.0432	0.1118	0.6993
Mean Thalamus	25607358	brain_volume	European	-0.0356	0.0779	0.6479	-0.3715	0.1436	0.0097	0.0797	0.1549	0.6069
Lung cancer	27488534	cancer	European	0.2318	0.0533	1.3531e-05	0.2905	0.0997	0.0036	0.268	0.1133	0.018
Lung cancer (all)	24880342	cancer	European	0.191	0.056	0.0006	0.2473	0.1143	0.0305	0.2711	0.1212	0.0252
Squamous cell lung cancer	27488534	cancer	European	0.3245	0.0881	0.0002	0.5093	0.1621	0.0017	0.4881	0.1737	0.005
Intelligence	28530673	cognitive	European	-0.1589	0.0311	3.2579e-07	-0.0977	0.0647	0.1307	-0.2214	0.0697	0.0015
Childhood IQ	23358156	education	European	-0.2888	0.0677	1.9798e-05	-0.2584	0.1218	0.034	-0.3265	0.1317	0.0131
College completion	23722424	education	European	-0.3145	0.0389	6.3823e-16	-0.3467	0.0794	1.2594e-05	-0.2871	0.0913	0.0017
Years of schooling (proxy cognitive performance)	25201988	education	European	-0.3363	0.0381	9.9761e-19	-0.3403	0.0754	6.3985e-06	-0.2396	0.0855	0.0051
Years of schooling 2013	23722424	education	European	-0.3521	0.0382	3.2859e-20	-0.329	0.0766	1.7511e-05	-0.293	0.0875	0.0008
Years of schooling 2016	27225129	education	European	-0.3275	0.0237	1.6118e-43	-0.3389	0.0522	8.3854e-11	-0.2648	0.0476	2.6803e-08
Fasting glucose main effect	22581228	glycemic	European	0.5425	0.0649	6.6122e-17	0.4582	0.1025	7.8181e-06	0.5685	0.1038	4.3792e-08
Fasting insulin main effect	22581228	glycemic	European	0.6344	0.0737	7.1583e-18	0.6533	0.1311	6.2361e-07	0.6258	0.1342	3.0919e-06
HbA1C	20858683	glycemic	European	0.5017	0.0677	1.2616e-13	0.3895	0.1014	0.0001	0.4595	0.1341	0.0006
HOMA-B	20081858	glycemic	European	0.1804	0.0709	0.011	0.2086	0.1198	0.0817	0.106	0.1136	0.3507
HOMA-IR	20081858	glycemic	European	0.6411	0.0949	1.426e-11	0.6034	0.1514	6.7102e-05	0.5688	0.1353	2.6103e-05
Type 2 Diabetes	22885922	glycemic	European	0.9927	0.0478	6.2164e-96	0.9603	0.1089	1.1554e-18	0.9141	0.103	6.7919e-19
Mean platelet volume	22139419	haemotological	European	0.0595	0.048	0.2156	0.0542	0.0849	0.5231	0.1505	0.1004	0.1338
Platelet count	22139419	haemotological	European	0.0816	0.0398	0.0403	0.0707	0.0727	0.331	0.1215	0.0811	0.1344
Leptin_adjBMI	26833098	hormone	European	0.1596	0.0686	0.0199	0.3849	0.129	0.0029	0.0785	0.1301	0.5462
Leptin_not_adjBMI	26833098	hormone	European	0.473	0.0706	2.1111e-11	0.8086	0.1335	1.3932e-09	0.2088	0.1175	0.0757
Urinary albumin-to-creatinine ratio	26631737	kidney	European	0.1882	0.0631	0.0029	0.2072	0.1163	0.0749	0.192	0.1358	0.1575
Urinary albumin-to-creatinine ratio (non-diabetes)	26631737	kidney	European	0.0638	0.0611	0.2968	0.0706	0.1192	0.5537	0.1386	0.1321	0.294
HDL cholesterol	20686565	lipids	European	-0.4188	0.0451	1.7336e-20	-0.3735	0.0676	3.3461e-08	-0.4149	0.0951	1.2866e-05
LDL cholesterol	20686565	lipids	European	0.1454	0.058	0.0121	0.1991	0.082	0.0153	0.2793	0.109	0.0104
Total Cholesterol	20686565	lipids	European	0.1127	0.0478	0.0183	0.1478	0.0679	0.0295	0.2518	0.0898	0.005
Triglycerides	20686565	lipids	European	0.3883	0.0647	1.9619e-09	0.3001	0.0763	8.4819e-05	0.5166	0.0945	4.5168e-08
FEV1/FVC	0	lung_function	European	0.1009	0.0259	9.8326e-05	0.1321	0.0434	0.0023	0.0694	0.0511	0.1745
FEV1/FVC	0	lung_function	European	0.0828	0.026	0.0015	0.1136	0.0419	0.0067	0.0576	0.0507	0.2564
FEV1/FVC	0	lung_function	European	-0.0002	0.047	0.9969	0.0262	0.0758	0.7301	-0.0269	0.0915	0.7684
Forced expiratory volume in 1 second	0	lung_function	European	-0.1827	0.0223	2.267e-16	-0.2112	0.0493	1.8432e-05	-0.2429	0.0457	1.069e-07
Forced expiratory volume in 1 second	0	lung_function	European	-0.1824	0.0225	5.9488e-16	-0.2048	0.0499	4.0463e-05	-0.217	0.0476	5.1066e-06
Forced expiratory volume in 1 second	0	lung_function	European	-0.1809	0.0382	2.1812e-06	-0.1879	0.0799	0.0187	-0.3343	0.0789	2.28e-05
Forced expiratory volume in 1 second (FEV1)	28166213	lung_function	European	-0.1685	0.0356	2.1906e-06	-0.328	0.1005	0.0011	-0.264	0.0669	7.9794e-05
Forced expiratory volume in 1 second (FEV1)	26635082	lung_function	European	-0.2008	0.0455	1.02e-05	-0.1926	0.0675	0.0043	-0.2647	0.0898	0.0032
Forced expiratory volume in 1 second (FEV1)	21946350	lung_function	European	-0.1448	0.0632	0.022	-0.1338	0.1193	0.2619	-0.129	0.1407	0.3594
Forced expiratory volume in 1 second (FEV1)/Forced Vital capacity(FVC)	28166213	lung_function	European	0.0357	0.037	0.3351	0.0626	0.0633	0.3229	-0.0672	0.0707	0.3419
Forced expiratory volume in 1 second (FEV1)/Forced Vital capacity(FVC)	21946350	lung_function	European	0.0282	0.0479	0.556	-0.0358	0.094	0.7032	-0.0759	0.0958	0.4279
Forced expiratory volume in 1 second (FEV1)/Forced Vital capacity(FVC)	26635082	lung_function	European	-0.0059	0.0519	0.909	-0.0294	0.0888	0.7405	-0.0533	0.1045	0.6097
Forced vital capacity	0	lung_function	European	-0.2453	0.0222	2.4352e-28	-0.2979	0.0512	5.9086e-09	-0.2937	0.0471	4.5954e-10
Forced vital capacity	0	lung_function	European	-0.2382	0.0221	5.6161e-27	-0.2845	0.0505	1.7974e-08	-0.2666	0.0478	2.4182e-08
Forced vital capacity	0	lung_function	European	-0.2047	0.0398	2.7479e-07	-0.2446	0.0807	0.0024	-0.3668	0.0842	1.3321e-05
Forced Vital capacity(FVC)	28166213	lung_function	European	-0.2289	0.0361	2.2162e-10	-0.2734	0.0729	0.0002	-0.3152	0.072	1.2122e-05
Forced Vital capacity(FVC)	26635082	lung_function	European	-0.2005	0.0455	1.0462e-05	-0.3042	0.0978	0.0019	-0.2692	0.0951	0.0046
Peak expiratory flow	0	lung_function	European	-0.0372	0.0267	0.163	-0.0232	0.0471	0.623	-0.0558	0.0519	0.2825
Peak expiratory flow	0	lung_function	European	-0.035	0.0261	0.1798	-0.0241	0.0499	0.6287	-0.0435	0.0509	0.3925
Peak expiratory flow	0	lung_function	European	-0.0475	0.0705	0.5009	-0.0646	0.1358	0.6345	-0.1065	0.1579	0.5002
18:2 linoleic acid (LA)	27005778	metabolites	European	-0.0502	0.0802	0.531	-0.0048	0.1485	0.9741	-0.2492	0.1579	0.1146
22:6 docosahexaenoic acid	27005778	metabolites	European	0.0949	0.079	0.2296	0.1137	0.1503	0.4491	0.344	0.1607	0.0323
Alanine	27005778	metabolites	European	0.0376	0.0788	0.6333	0.2843	0.1423	0.0458	-0.0349	0.1384	0.8009
Apolipoprotein A-I	27005778	metabolites	European	-0.3231	0.1093	0.0031	-0.187	0.175	0.2852	-0.1969	0.1874	0.2934
Apolipoprotein B	27005778	metabolites	European	0.2907	0.1247	0.0198	0.3398	0.1897	0.0733	0.4203	0.2069	0.0422
Average number of double bonds in a fatty acid chain	27005778	metabolites	European	-0.0194	0.0617	0.754	0.0247	0.106	0.8156	0.0501	0.1196	0.6754
Cholesterol esters in large HDL	27005778	metabolites	European	-0.4243	0.0783	5.8973e-08	-0.3659	0.1456	0.012	-0.4815	0.1507	0.0014
Cholesterol esters in large LDL	27005778	metabolites	European	0.1279	0.1125	0.2553	0.2205	0.1919	0.2505	0.2734	0.2293	0.2332
Cholesterol esters in large VLDL	27005778	metabolites	European	0.3111	0.0707	1.0942e-05	0.3621	0.1315	0.0059	0.2303	0.1219	0.0589
Cholesterol esters in medium LDL	27005778	metabolites	European	0.1593	0.1132	0.1592	0.2496	0.1899	0.1889	0.291	0.2232	0.1924
Cholesterol esters in medium VLDL	27005778	metabolites	European	0.2612	0.0786	0.0009	0.2825	0.1345	0.0357	0.2194	0.1232	0.075
Citrate	27005778	metabolites	European	-0.0494	0.0779	0.5259	-0.3749	0.1505	0.0127	0.0005	0.1669	0.9978
Concentration of chylomicrons and largest VLDL particles	27005778	metabolites	European	0.3988	0.0884	6.5091e-06	0.4116	0.1433	0.0041	0.2977	0.1462	0.0417
Concentration of IDL particles	27005778	metabolites	European	0.1167	0.1059	0.2706	0.2136	0.1882	0.2563	0.1762	0.2084	0.3979
Concentration of large HDL particles	27005778	metabolites	European	-0.4179	0.0711	4.233e-09	-0.3819	0.1397	0.0063	-0.4325	0.141	0.0022
Concentration of large LDL particles	27005778	metabolites	European	0.1389	0.1156	0.2297	0.239	0.1981	0.2277	0.2535	0.2284	0.2672
Concentration of large VLDL particles	27005778	metabolites	European	0.3501	0.0897	9.5423e-05	0.2964	0.1279	0.0205	0.2485	0.1266	0.0497
Concentration of medium LDL particles	27005778	metabolites	European	0.181	0.1189	0.1281	0.2739	0.1954	0.1609	0.2961	0.224	0.1863
Concentration of medium VLDL particles	27005778	metabolites	European	0.3289	0.0797	3.675e-05	0.2678	0.125	0.0322	0.3192	0.1211	0.0084
Concentration of small LDL particles	27005778	metabolites	European	0.1881	0.1082	0.0822	0.2572	0.1721	0.1351	0.2508	0.1907	0.1886
Concentration of small VLDL particles	27005778	metabolites	European	0.2973	0.0786	0.0002	0.2884	0.1369	0.0351	0.2746	0.1267	0.0302
Concentration of very large VLDL particles	27005778	metabolites	European	0.3361	0.0804	2.8916e-05	0.2194	0.14	0.1171	0.2985	0.137	0.0294
Concentration of very small VLDL particles	27005778	metabolites	European	0.1741	0.0797	0.029	0.2162	0.1444	0.1344	0.1625	0.1437	0.2581
Creatinine	27005778	metabolites	European	-0.0602	0.064	0.347	-0.0483	0.1266	0.7028	-0.0995	0.129	0.4405
Free cholesterol in IDL	27005778	metabolites	European	0.0095	0.0889	0.915	0.1196	0.1755	0.4954	0.0972	0.1884	0.606
Free cholesterol in large HDL	27005778	metabolites	European	-0.4483	0.0821	4.7459e-08	-0.3848	0.1469	0.0088	-0.5172	0.1492	0.0005
Free cholesterol in large LDL	27005778	metabolites	European	0.0648	0.0998	0.5163	0.1909	0.2	0.3397	0.1632	0.2178	0.4536
Free cholesterol in large VLDL	27005778	metabolites	European	0.2947	0.0805	0.0003	0.2995	0.13	0.0213	0.2516	0.1293	0.0516
Free cholesterol in medium HDL	27005778	metabolites	European	-0.3254	0.0958	0.0007	-0.4608	0.1787	0.0099	-0.0937	0.1836	0.6098
Free cholesterol in medium VLDL	27005778	metabolites	European	0.316	0.0953	0.0009	0.3066	0.1429	0.0319	0.313	0.1357	0.0211
Free cholesterol in small VLDL	27005778	metabolites	European	0.2669	0.0859	0.0019	0.2925	0.1494	0.0502	0.3369	0.145	0.0202
Glucose	27005778	metabolites	European	0.3038	0.0744	4.4333e-05	0.3112	0.1317	0.0181	0.293	0.1497	0.0503
Glutamine	27005778	metabolites	European	-0.3267	0.0989	0.001	-0.4569	0.1744	0.0088	-0.3538	0.1797	0.049
Isoleucine	27005778	metabolites	European	0.4493	0.111	5.215e-05	0.3782	0.1665	0.0231	0.2401	0.1401	0.0866
Mean diameter for HDL particles	27005778	metabolites	European	-0.4119	0.0783	1.4163e-07	-0.2964	0.1354	0.0285	-0.5151	0.148	0.0005
Mean diameter for VLDL particles	27005778	metabolites	European	0.3329	0.0817	4.6253e-05	0.2357	0.1318	0.0737	0.318	0.1296	0.0142
Omega-3 fatty acids	27005778	metabolites	European	0.1252	0.0831	0.1322	0.0931	0.156	0.5508	0.2271	0.1569	0.1479
Phospholipids in chylomicrons and largest VLDL particles	27005778	metabolites	European	0.3262	0.0874	0.0002	0.3473	0.1378	0.0117	0.1531	0.1394	0.2722
Phospholipids in IDL	27005778	metabolites	European	0.0924	0.1118	0.4089	0.2319	0.2122	0.2743	0.1935	0.2226	0.3848
Phospholipids in large HDL	27005778	metabolites	European	-0.4229	0.0717	3.7336e-09	-0.4031	0.1441	0.0052	-0.4124	0.1429	0.0039
Phospholipids in large LDL	27005778	metabolites	European	0.1327	0.1133	0.2414	0.2458	0.2094	0.2405	0.2361	0.2275	0.2994
Phospholipids in large VLDL	27005778	metabolites	European	0.3429	0.0876	8.9981e-05	0.3189	0.1341	0.0174	0.2947	0.13	0.0234
Phospholipids in medium HDL	27005778	metabolites	European	-0.2611	0.0938	0.0054	-0.4136	0.1805	0.0219	-0.0203	0.1834	0.912
Phospholipids in medium LDL	27005778	metabolites	European	0.1741	0.1067	0.1026	0.2067	0.1736	0.2338	0.2739	0.2033	0.1779
Phospholipids in medium VLDL	27005778	metabolites	European	0.3407	0.0983	0.0005	0.3386	0.1447	0.0193	0.3443	0.1378	0.0124
Phospholipids in small VLDL	27005778	metabolites	European	0.2485	0.0864	0.004	0.2609	0.1477	0.0773	0.2795	0.14	0.0459
Phospholipids in very large HDL	27005778	metabolites	European	-0.383	0.0923	3.3173e-05	-0.2345	0.1518	0.1225	-0.5457	0.166	0.001
Phospholipids in very large VLDL	27005778	metabolites	European	0.3402	0.0865	8.3302e-05	0.3118	0.1309	0.0172	0.2832	0.135	0.036
Phospholipids in very small VLDL	27005778	metabolites	European	0.1001	0.0915	0.2739	0.1816	0.1657	0.2731	0.1321	0.1748	0.4499
Serum total triglycerides	27005778	metabolites	European	0.3189	0.094	0.0007	0.3477	0.1435	0.0154	0.2782	0.1209	0.0214
Total cholesterol in HDL	27005778	metabolites	European	-0.4055	0.0831	1.0642e-06	-0.3732	0.1527	0.0145	-0.3445	0.153	0.0244
Total cholesterol in IDL	27005778	metabolites	European	0.0612	0.1026	0.5512	0.143	0.1837	0.4361	0.1646	0.2155	0.4451
Total cholesterol in large HDL	27005778	metabolites	European	-0.4412	0.0821	7.821e-08	-0.3858	0.1486	0.0094	-0.4989	0.155	0.0013
Total cholesterol in large LDL	27005778	metabolites	European	0.1029	0.1056	0.3297	0.2237	0.2007	0.2649	0.2122	0.2199	0.3346
Total cholesterol in large VLDL	27005778	metabolites	European	0.2962	0.081	0.0003	0.2851	0.127	0.0248	0.2335	0.1341	0.0818
Total cholesterol in LDL	27005778	metabolites	European	0.1565	0.1144	0.1715	0.2389	0.1938	0.2177	0.2952	0.2321	0.2035
Total cholesterol in medium LDL	27005778	metabolites	European	0.1428	0.1066	0.1804	0.2238	0.1905	0.24	0.2459	0.2152	0.2531
Total cholesterol in medium VLDL	27005778	metabolites	European	0.2621	0.0854	0.0021	0.2745	0.1407	0.051	0.2289	0.1246	0.0662
Total cholesterol in small LDL	27005778	metabolites	European	0.1928	0.1277	0.1312	0.2978	0.2012	0.1389	0.3111	0.2356	0.1867
Total cholesterol in small VLDL	27005778	metabolites	European	0.2325	0.0967	0.0161	0.2756	0.1677	0.1003	0.2868	0.1631	0.0787
Total lipids in chylomicrons and largest VLDL particles	27005778	metabolites	European	0.3666	0.0814	6.6504e-06	0.3638	0.1345	0.0068	0.2154	0.1395	0.1225
Total lipids in IDL	27005778	metabolites	European	0.0951	0.1049	0.3651	0.1862	0.187	0.3192	0.167	0.2112	0.429
Total lipids in large HDL	27005778	metabolites	European	-0.4194	0.073	9.0676e-09	-0.3793	0.1411	0.0072	-0.442	0.143	0.002
Total lipids in large LDL	27005778	metabolites	European	0.1304	0.1147	0.2558	0.2303	0.1979	0.2444	0.2553	0.2304	0.2679
Total lipids in large VLDL	27005778	metabolites	European	0.3448	0.0763	6.2393e-06	0.2871	0.1216	0.0182	0.2086	0.1236	0.0916
Total lipids in medium LDL	27005778	metabolites	European	0.176	0.1168	0.1317	0.2725	0.193	0.158	0.3015	0.2236	0.1775
Total lipids in medium VLDL	27005778	metabolites	European	0.3314	0.0833	6.8897e-05	0.319	0.1329	0.0164	0.2652	0.1209	0.0283
Total lipids in small LDL	27005778	metabolites	European	0.2019	0.1161	0.0819	0.2799	0.1848	0.1299	0.2785	0.2059	0.1762
Total lipids in small VLDL	27005778	metabolites	European	0.2893	0.0805	0.0003	0.2829	0.1421	0.0466	0.2899	0.1324	0.0285
Total lipids in very large VLDL	27005778	metabolites	European	0.3042	0.0713	2.014e-05	0.2779	0.1262	0.0277	0.1751	0.1247	0.1601
Total lipids in very small VLDL	27005778	metabolites	European	0.1547	0.0829	0.062	0.2065	0.1487	0.165	0.1289	0.1502	0.3907
Triglycerides in chylomicrons and largest VLDL particles	27005778	metabolites	European	0.3686	0.1036	0.0004	0.4104	0.1546	0.0079	0.267	0.1483	0.0717
Triglycerides in IDL	27005778	metabolites	European	0.182	0.0862	0.0347	0.2795	0.1544	0.0703	0.177	0.1539	0.2499
Triglycerides in large VLDL	27005778	metabolites	European	0.3456	0.0875	7.7739e-05	0.3285	0.1304	0.0117	0.2299	0.1303	0.0776
Triglycerides in medium VLDL	27005778	metabolites	European	0.3989	0.1077	0.0002	0.4048	0.1503	0.0071	0.3643	0.1469	0.0131
Triglycerides in small VLDL	27005778	metabolites	European	0.326	0.0899	0.0003	0.3407	0.1475	0.0209	0.3156	0.1283	0.0139
Triglycerides in very large VLDL	27005778	metabolites	European	0.2991	0.0778	0.0001	0.3288	0.1304	0.0117	0.2003	0.1285	0.119
Triglycerides in very small VLDL	27005778	metabolites	European	0.2528	0.08	0.0016	0.2948	0.1413	0.037	0.2163	0.1311	0.099
Valine	27005778	metabolites	European	0.3823	0.1003	0.0001	0.3608	0.1573	0.0218	0.1969	0.1516	0.194
Ferritin	25352340	metal	European	0.0349	0.0788	0.658	0.1044	0.1518	0.4917	-0.0651	0.1663	0.6957
Alzheimers disease	24162737	neurological	European	0.0925	0.0768	0.2284	-0.0627	0.1295	0.6281	0.3404	0.1725	0.0485
Parkinsons disease	19915575	neurological	European	-0.0237	0.0458	0.6044	-0.1201	0.0887	0.1757	0.0407	0.0925	0.6604
Urate	23263486	other	European	0.292	0.0676	1.5404e-05	0.2966	0.0652	5.3928e-06	0.2249	0.0609	0.0002
Neo-openness to experience	21173776	personality	European	0.0017	0.0736	0.9819	0.1359	0.1448	0.3482	-0.0595	0.1537	0.6988
Neuroticism	24828478	personality	European	0.1288	0.0784	0.1004	0.1157	0.1488	0.4369	0.1603	0.0772	0.0379
Neuroticism	27089181	personality	European	0.0771	0.0502	0.1244	0.0254	0.0732	0.7284	0.1596	0.1541	0.3001
Anorexia Nervosa	24514567	psychiatric	European	-0.155	0.0371	2.9393e-05	-0.052	0.067	0.4373	-0.133	0.0682	0.051
Autism spectrum disorder	0	psychiatric	European	-0.0871	0.054	0.1065	-0.0557	0.1042	0.5933	-0.0958	0.103	0.3522
Bipolar disorder	21926972	psychiatric	European	-0.1032	0.043	0.0164	-0.0489	0.0772	0.5266	0.0007	0.0851	0.9934
Depressive symptoms	27089181	psychiatric	European	0.2354	0.0445	1.2694e-07	0.1486	0.0817	0.0689	0.2304	0.0807	0.0043
Major depressive disorder	22472876	psychiatric	European	0.125	0.054	0.0206	0.1651	0.1164	0.1562	0.2639	0.1231	0.032
PGC cross-disorder analysis	23453885	psychiatric	European	-0.0465	0.0395	0.239	0.0443	0.0894	0.6199	-0.0181	0.0891	0.839
Subjective well being	27089181	psychiatric	European	-0.0825	0.045	0.0668	-0.0543	0.078	0.4862	-0.1315	0.0892	0.1405
Age at Menarche	25231870	reproductive	European	-0.2271	0.0294	1.1227e-14	-0.2225	0.0565	8.1756e-05	-0.2195	0.0572	0.0001
Age at Menopause	26414677	reproductive	European	-0.1585	0.0408	0.0001	-0.0963	0.0759	0.2044	-0.1632	0.0821	0.0467
Age of first birth	27798627	reproductive	European	-0.3988	0.0348	2.1561e-30	-0.5005	0.0684	2.5257e-13	-0.2527	0.0804	0.0017
Number of children ever born	27798627	reproductive	European	0.1514	0.0369	4.1549e-05	0.0971	0.0711	0.1719	-0.014	0.0895	0.8756
Chronotype	27494321	sleeping	European	0.0945	0.0346	0.0063	0.0909	0.0695	0.1907	0.1088	0.0712	0.1266
Excessive daytime sleepiness	27992416	sleeping	European	0.1741	0.0409	2.1024e-05	0.2201	0.0855	0.01	0.3247	0.0821	7.6672e-05
Insomnia	28604731	sleeping	European	0.3105	0.0498	4.6581e-10	0.2624	0.0825	0.0015	0.2941	0.1002	0.0033
Insomnia	27992416	sleeping	European	0.2449	0.0514	1.8891e-06	0.2394	0.0793	0.0025	0.1828	0.0833	0.0282
Sleep duration	27494321	sleeping	European	-0.0201	0.0467	0.6675	-0.1248	0.08	0.1185	-0.0564	0.0881	0.5223
Age of smoking initiation	20418890	smoking_behaviour	European	-0.3007	0.0999	0.0026	-0.1486	0.152	0.3284	-0.4859	0.2064	0.0186
Cigarettes smoked per day	20418890	smoking_behaviour	European	0.2967	0.0684	1.4355e-05	0.3138	0.1343	0.0195	0.2499	0.1385	0.0711
Ever vs never smoked	20418890	smoking_behaviour	European	0.2254	0.0419	7.2103e-08	0.185	0.0857	0.0308	0.2229	0.087	0.0104
Former vs Current smoker	20418890	smoking_behaviour	European	-0.3306	0.068	1.1521e-06	-0.2267	0.1125	0.0439	-0.219	0.1249	0.0795
Smoking Initiation	30617275	smoking_behaviour	European	0.1324	0.0578	0.022	0.1681	0.1181	0.1547	-0.0078	0.121	0.9483

## Sheet: Supplementary Table 10
Supplementary Table 10: Mendelian Randomization analyses in the UK Biobank
Results of the two-sample Mendelian Randomization analyses. Results can be interpreted in the change in risk (in logodds) with accompanied standard error per unit increase in the exposure.
				Overall GWAS			Diagnosed before age 50 years			Diagnosed between age 50 and 60 years			Diagnosed between age 60 and 70 years			Diagnosed after age 70 years
exposure	method	Unit	Number of instruments	Beta	SE	P	Beta	SE	P	Beta	SE	P	Beta	SE	P	Beta	SE	P	Interaction beta (age<50 years, age>70 years)	SE	Z-score	P-Value
Years of schooling	Inverse variance weighted	Years	307	-0.742351	0.0622555	8.84626e-33	-0.804052	0.140019	9.33149e-09	-0.840653	0.0928733	1.40869e-19	-0.77474	0.0780993	3.41003e-23	-0.602108	0.115828	2.01143e-07	0.201943	0.181718	1.1113	0.215147
	Weighted median		307	-0.642938	0.0719055	3.84183e-19	-0.772867	0.205265	0.000166409	-0.808572	0.121331	2.66141e-11	-0.828673	0.104185	1.80796e-15	-0.589221	0.15276	0.000114712	0.183647	0.25587	0.717734	0.308353
	MR Egger		307	-0.32503	0.244291	0.184347	-0.490413	0.551956	0.374972	-0.411872	0.365411	0.260566	-0.374137	0.307103	0.224059	-0.127037	0.455967	0.780733	0.363376	0.715934	0.507555	0.350728
Birth weight	Inverse variance weighted	gram	4	-0.452971	0.389747	0.245147	-0.233208	0.560332	0.677266	-0.245484	0.359336	0.494507	-0.686727	0.445481	0.123185	-0.309975	0.372134	0.404865	-0.0767663	0.672649	0.114125	0.396353
	Weighted median		4	-0.158252	0.12119	0.191615	-0.0465884	0.319127	0.883932	0.113913	0.189682	0.548143	-0.498961	0.185027	0.00700314	-0.291041	0.228356	0.202485	-0.244452	0.392414	0.622945	0.328582
	MR Egger		4	1.22614	2.31195	0.648866	3.25099	2.7912	0.364266	2.0244	1.76667	0.370455	1.04488	2.70947	0.736918	-0.214527	2.49051	0.939204	-3.46552	3.74078	0.926415	0.259743
systolic blood pressure	Inverse variance weighted	mmHg	446	0.0176949	0.00325295	5.33798e-08	0.0128086	0.00555894	0.0212143	0.0204688	0.00385154	1.06986e-07	0.0178189	0.00401119	8.89999e-06	0.0155945	0.00469356	0.000892036	0.00278591	0.00727539	0.382923	0.37074
	Weighted median		446	0.0101885	0.00286677	0.000379439	0.00480075	0.00777151	0.536749	0.0140396	0.00478132	0.00332102	0.0114123	0.00432108	0.00826462	0.0105134	0.00633123	0.0968019	0.00571264	0.010024	0.569895	0.339145
	MR Egger		446	-0.00693164	0.00807097	0.390894	-0.017727	0.0138741	0.202022	-0.0105426	0.00954073	0.269754	-0.0107883	0.00996679	0.279649	0.0101558	0.0117866	0.389352	0.0278827	0.0182048	1.53162	0.123457
body mass index	Inverse variance weighted	Standard deviation	492	0.964022	0.059178	1.15806e-59	1.31046	0.096139	2.62277e-42	1.13406	0.0697826	2.18787e-59	0.958143	0.0690105	7.91799e-44	0.681301	0.0853254	1.40819e-15	-0.629162	0.128542	4.89459	2.50448e-06
	Weighted median		492	0.992349	0.0574161	6.26587e-67	1.40304	0.143936	1.88737e-22	1.1902	0.0866467	6.15967e-43	1.0318	0.0793187	1.0987e-38	0.651464	0.11804	3.40876e-08	-0.751574	0.186147	4.03752	0.000115097
	MR Egger		492	0.865521	0.157078	5.80251e-08	1.48256	0.255215	1.13165e-08	1.09537	0.185317	6.3842e-09	0.764147	0.183044	3.53196e-05	0.613287	0.22659	0.00703493	-0.869275	0.341289	2.54704	0.0155664
Isoleucine	Inverse variance weighted	Standard deviation	4	-0.00992124	0.305954	0.974131	0.160975	0.185738	0.386119	0.032437	0.34233	0.924511	-0.0166226	0.40702	0.967424	-0.122721	0.145199	0.398006	-0.283695	0.235757	1.20334	0.193409
	Weighted median		4	0.193034	0.0841095	0.0217311	0.301652	0.228463	0.186717	0.242599	0.139756	0.0825869	0.285199	0.130965	0.0294303	-0.0252476	0.178043	0.887233	-0.3269	0.289646	1.12862	0.211015
	MR Egger		4	1.83902	1.17734	0.258692	1.46103	0.883089	0.239861	1.74641	1.56108	0.379592	2.56381	1.46179	0.221541	0.725464	0.690333	0.403555	-0.735566	1.1209	0.656231	0.321661
Resting heart rate	Inverse variance weighted	Beats per minute	62	0.00475086	0.00616667	0.441057	-0.00667049	0.0115217	0.562621	0.00378213	0.00929166	0.683974	0.00997242	0.0072029	0.166205	0.00086211	0.00879925	0.921952	0.0075326	0.0144974	0.519582	0.348568
	Weighted median		62	0.00327386	0.00581477	0.573418	-0.0140752	0.0172098	0.413439	-0.00319996	0.0112394	0.775867	0.0135643	0.0084339	0.107768	-0.0116815	0.0128794	0.364412	0.00239369	0.0214955	0.111358	0.396476
	MR Egger		62	0.0109823	0.0147887	0.460613	0.0479699	0.0265716	0.0760445	-0.00641804	0.0222776	0.774267	0.0337343	0.0169733	0.0514382	-0.0194634	0.0209451	0.356479	-0.0674334	0.0338341	1.99306	0.0547446
Childhood body mass index	Inverse variance weighted	Standard deviation	13	0.528467	0.13343	7.47478e-05	0.988629	0.142815	4.43933e-12	0.679611	0.177312	0.000126665	0.514295	0.141116	0.000267937	0.226923	0.150737	0.132216	-0.761706	0.207649	3.66825	0.000477495
	Weighted median		13	0.393971	0.0871174	6.11717e-06	0.84716	0.208645	4.90118e-05	0.501634	0.129341	0.000105148	0.40903	0.119831	0.000641575	0.0480032	0.166614	0.773262	-0.799156	0.267007	2.99301	0.0045256
	MR Egger		13	0.603462	0.525063	0.274803	1.12269	0.538327	0.0611131	1.00629	0.690618	0.173041	0.538482	0.555831	0.353471	0.0774745	0.591793	0.898206	-1.04521	0.80001	1.3065	0.169923
Depression	Inverse variance weighted	Yes/no	62	0.241786	0.0832931	0.00369799	0.222629	0.206432	0.280828	0.251745	0.111048	0.0233914	0.215033	0.102985	0.036798	0.294819	0.137632	0.0321864	0.0721894	0.248106	0.290961	0.382408
	Weighted median		62	0.166747	0.092818	0.0724159	0.0743543	0.265326	0.779295	0.230674	0.151633	0.128192	0.151207	0.132169	0.252607	0.267695	0.189295	0.157313	0.19334	0.32593	0.593196	0.33458
	MR Egger		62	0.126376	0.394119	0.749587	0.255807	0.97744	0.79444	0.220606	0.525858	0.676337	-0.0907531	0.485968	0.852489	0.388035	0.651586	0.553734	0.132227	1.17471	0.112561	0.396423
Insomnia	Inverse variance weighted	Yes/no	234	0.164163	0.0234322	2.45421e-12	0.127878	0.0466037	0.00607039	0.193451	0.0324344	2.4554e-09	0.163861	0.0292282	2.06734e-08	0.150099	0.0370626	5.1241e-05	0.022221	0.0595444	0.373183	0.372108
	Weighted median		234	0.136382	0.0252901	6.93977e-08	0.136439	0.0653509	0.0368162	0.171146	0.0408574	2.80368e-05	0.153693	0.035675	1.64623e-05	0.143004	0.0512051	0.00522575	0.00656515	0.0830223	0.079077	0.397697
	MR Egger		234	0.0929582	0.0795193	0.243603	-0.0770389	0.157953	0.6262	0.0447641	0.109875	0.684082	0.151324	0.0993995	0.129275	0.0705108	0.12598	0.576226	0.14755	0.20204	0.730299	0.305561
Alanine transaminase	Inverse variance weighted	% increase	4	0.00299297	0.00155609	0.0544316	0.00167458	0.0043951	0.703195	-0.00278672	0.00373596	0.455716	0.00772981	0.00497671	0.120376	0.00145322	0.0041501	0.726215	-0.00022136	0.00604485	0.0366196	0.398675
	Weighted median		4	0.00399694	0.00167005	0.0166973	0.00144768	0.00451689	0.748586	-0.00122578	0.00290131	0.672666	0.010658	0.00265897	6.11559e-05	-0.000301069	0.00387819	0.938121	-0.00174875	0.00595338	0.293741	0.382097
	MR Egger		4	0.00453825	0.00377362	0.352182	0.00662278	0.00916486	0.544985	0.00483074	0.0073048	0.576408	0.0119653	0.0122414	0.431429	-0.0108445	0.00716758	0.269447	-0.0174673	0.0116348	1.50129	0.129266

[truncated: 2 more sheets: Supplementary Table 11, Supplementary Table 12]
